# Supplementary material for: Interaction strength of osmolytes with the anion of a salt-bridge determines its stability
Source: Royal Society of Chemistry journal article supplement (doi:10.1039/d0cp05378c), 2021-01-01
Supplement: d0cp05378c1.pdf [file d0cp05378c1.pdf]

## Supplementary Information

### **Interaction strength of osmolytes with the anion of a salt-bridge determines its stability**

**Mrityunjay K. Tiwari<sup>1</sup> and Rajesh K. Murarka<sup>1\*</sup>**

Correspondence to: Rajesh Kumar Murarka (E-mail: rkm@iiserb.ac.in)

*<sup>1</sup>Department of Chemistry  
Indian Institute of Science Education and Research Bhopal  
Bhopal Bypass Road, Bhopal, MP 462066*

## Contents

|                                                                                                                                                                        |    |
|------------------------------------------------------------------------------------------------------------------------------------------------------------------------|----|
| <b>Table S1</b> Energetics in kcal/mol of the noncovalent complex formed between the guanidinium ion and the salt-bridge model complex .....                           | 1  |
| <b>Table S2</b> Energetics in kcal/mol of the noncovalent complex formed between the guanidinium chloride and the salt-bridge model complex .....                      | 2  |
| <b>Table S3</b> Energetics in kcal/mol of the noncovalent complex formed between the urea and the salt-bridge model complex .....                                      | 3  |
| <b>Table S4</b> Energetics in kcal/mol of the noncovalent complex formed between the trimethylamine N-oxide and the salt-bridge model complex .....                    | 4  |
| <b>Table S5</b> Energetics in kcal/mol of the noncovalent complex formed between the glycerol and the salt-bridge model complex .....                                  | 5  |
| <b>Table S6</b> Energetics in kcal/mol of the noncovalent complex formed between two guanidinium ions and the salt-bridge model complex .....                          | 6  |
| <b>Table S7</b> Energetics in kcal/mol of the noncovalent complex formed between two trimethylamine N-oxide molecules and the salt-bridge model complex .....          | 7  |
| <b>Table S8</b> Energetics in kcal mol <sup>-1</sup> for the adsorption of the second molecule of osmolytes on the salt-bridge model complex .....                     | 8  |
| <b>Table S9</b> Energetics in kcal mol <sup>-1</sup> of binding of osmolytes with the free acetate ion.....                                                            | 9  |
| <b>Table S10</b> Energetics in kcal/mol of binding of TMAO with the free MeGdm <sup>+</sup> ion .....                                                                  | 10 |
| <b>Fig. S1.</b> Optimized geometries at the CPCM(water)/M06-2X/6-311G** level of theory of the salt-bridge model complex in the presence of one guanidinium ion .....  | 11 |
| <b>Fig. S2</b> Optimized geometries at the CPCM(water)/M06-2X/6-311G** level of theory of the salt-bridge model complex in the presence of one molecule of GdmCl ..... | 12 |
| <b>Fig. S3</b> Optimized geometries at the CPCM(water)/M06-2X/6-311G** level of theory of the salt-bridge model complex in the presence of one molecule of urea .....  | 13 |
| <b>Fig. S4</b> Optimized geometries at the CPCM(water)/M06-2X/6-311G** level of theory of the salt-bridge model complex in the presence of one molecule of TMAO .....  | 14 |

|                                                                                                                                                                                                                                                                  |    |
|------------------------------------------------------------------------------------------------------------------------------------------------------------------------------------------------------------------------------------------------------------------|----|
| <b>Fig. S5</b> Optimized geometries at the CPCM(water)/M06-2X/6-311G** level of theory of the salt-bridge model complex in the presence of one molecule of glycerol .....                                                                                        | 15 |
| <b>Fig. S6</b> Optimized geometries at the CPCM(water)/M06-2X/6-311G** level of theory of the salt-bridge model complex in the presence of two guanidinium ions .....                                                                                            | 16 |
| <b>Fig. S7</b> Optimized geometries at the CPCM(water)/M06-2X/6-311G** level of theory of the salt-bridge model complex in the presence of two molecules of TMAO .....                                                                                           | 17 |
| <b>Fig. S8</b> The molecular surface electrostatic potential computed on the 0.0004 au contour of electron density at the CPCM(water)/M06-2X/6-311++G** level of theory: a) model salt-bridge, b) Gdm <sup>+</sup> ···SB complex, and d) TMAO···SB complex ..... | 18 |
| <b>Fig. S9</b> Optimized geometries at the CPCM(water)/M06-2X/6-311++G** level of theory. a) Gdm <sup>+</sup> ···acetate, b) glycerol···acetate, c) urea···acetate and d) TMAO···MeGdm <sup>+</sup> complexes in their lowest energy conformations .....         | 19 |
| <b>Fig. S10</b> The molecular surface electrostatic potential computed on the 0.0004 au contour of electron density at the CPCM(water)/M06-2X/6-311++G** level of theory: a) MeGdm <sup>+</sup> , b) MeGdm <sup>+</sup> ···TMAO complex .....                    | 20 |
| <b>Fig. S11</b> Schematic representations of designed Gdm <sup>+</sup> -based osmolytes (a-c) and the glycine betaine (d) .....                                                                                                                                  | 21 |
| XYZ Coordinates of the optimized geometries obtained at the CPCM(water)/M06-2X/6-311G** level of theory .....                                                                                                                                                    | 22 |
| XYZ Coordinates of the optimized geometries obtained at the CPCM(water)/M06-2X/6-311++G** level of theory .....                                                                                                                                                  | 32 |
| XYZ Coordinates of the optimized geometries obtained at the CPCM(water)/MP2/6-311G** level of theory .....                                                                                                                                                       | 42 |



**Table S1** Energetics in kcal/mol of the noncovalent complex formed between the guanidinium ion and the salt-bridge model complex

| Orientation | Level of theory | $\Delta E$ | $E_b$ | $\Delta H_b$ | $\Delta G_b$ | $I_{ca\cdots an,osm}$ | $I_{osm\cdots SB}$ |
|-------------|-----------------|------------|-------|--------------|--------------|-----------------------|--------------------|
| Ort1        | L <sub>1</sub>  | 0.1        | -15.8 | -13.7        | -0.8         | -24.2                 | -19.7              |
|             | L <sub>2</sub>  | 0.1        | -12.7 | -10.4        | -0.2         | -17.8                 | -15.9              |
| Ort2        | L <sub>1</sub>  | 0.9        | -14.9 | -13.0        | -1.6         | -26.6                 | -17.5              |
|             | L <sub>2</sub>  | 0.6        | -12.1 | -9.8         | 0.0          | -19.6                 | -14.3              |
|             | L <sub>3</sub>  | 0.3        | -15.4 | -13.5        | -3.1         | -27.9                 | -17.5              |
| Ort3        | L <sub>1</sub>  | 5.6        | -10.2 | -8.2         | 5.4          | -27.3                 | -12.6              |
|             | L <sub>2</sub>  | 8.7        | -4.0  | -1.8         | 8.7          | -21.5                 | -4.4               |
| Ort4        | L <sub>1</sub>  | 0.0        | -15.8 | -13.8        | -1.4         | -24.2                 | -19.7              |
|             | L <sub>2</sub>  | 0.0        | -12.7 | -10.4        | 0.2          | -17.9                 | -15.9              |
|             | L <sub>3</sub>  | 0.0        | -15.7 | -13.9        | -2.8         | -24.7                 | -19.8              |
| Ort5        | L <sub>1</sub>  | 0.9        | -14.9 | -12.9        | -1.5         | -26.7                 | -17.4              |
|             | L <sub>2</sub>  | 0.7        | -12.1 | -9.8         | 0.1          | -19.7                 | -14.3              |
| Ort6        | L <sub>1</sub>  | 1.1        | -14.8 | -12.6        | 0.0          | -26.4                 | -17.5              |
|             | L <sub>2</sub>  | 0.7        | -12.1 | -9.4         | 1.8          | -19.4                 | -14.4              |
| Ort7        | L <sub>1</sub>  | 5.1        | -10.7 | -8.4         | 5.6          | -26.5                 | -12.9              |
|             | L <sub>2</sub>  | -          | -     | -            | -            | -                     | -                  |

Ort 1 to Ort7 represent the different orientations in which one Gdm<sup>+</sup> ion was optimized with the salt-bridge model complex. Please see Fig. S1 for the structures.

We could not locate the geometry in Ort7 at the L<sub>2</sub> level of theory. Ort 3 is a  $\pi$ - $\pi$  stacking complex, whereas all other geometries belong to the hydrogen bonding complex.

L<sub>1</sub>, L<sub>2</sub> and L<sub>3</sub> are the CPCM(water)/M06-2X/6-311G\*\*, CPCM(water)/M06-2X/6-311++G\*\* and CPCM(water)/MP2/6-311G\*\* levels of theory, respectively.

$\Delta E$  = Relative electronic energy of the given geometry with respect to the lowest energy one.

$E_b$ ,  $\Delta H_b$  and  $\Delta G_b$  are binding energy, enthalpy of binding and the free energy of binding, respectively.

$I_{ca\cdots an,osm}$  = Energy of interaction between cation and anion of the SB in osmolyte $\cdots$ SB complex

$I_{osm\cdots SB}$  = Energy of interaction between osmolyte and the SB in the osmolyte $\cdots$ SB complex

**Table S2** Energetics in kcal/mol of the noncovalent complex formed between the guanidinium chloride and the salt-bridge model complex

| Orientation | Level of theory | $\Delta E$ | $E_b$ | $\Delta H_b$ | $\Delta G_b$ | $I_{ca\cdots an,osm}$ | $I_{osm\cdots SB}$ |
|-------------|-----------------|------------|-------|--------------|--------------|-----------------------|--------------------|
| Ort1        | L <sub>1</sub>  | 6.6        | -10.6 | -8.4         | 5.2          | -26.9                 | -12.5              |
|             | L <sub>2</sub>  | 5.6        | -8.7  | -5.6         | 8.5          | -19.8                 | -10.6              |
| Ort2        | L <sub>1</sub>  | 0.0        | -17.2 | -14.2        | 3.5          | -24.1                 | -24.2              |
|             | L <sub>2</sub>  | 0.0        | -14.3 | -11.0        | 4.5          | -17.5                 | -20.8              |
| Ort3        | L <sub>1</sub>  | 0.7        | -16.4 | -13.6        | 3.3          | -25.4                 | -24.1              |
|             | L <sub>2</sub>  | 0.1        | -14.3 | -10.9        | 3.9          | -18.9                 | -20.9              |
| Ort4        | L <sub>1</sub>  | 3.4        | -13.8 | -11.3        | 2.3          | -26.9                 | -16.1              |
|             | L <sub>2</sub>  | 3.2        | -11.2 | -8.2         | 3.4          | -19.8                 | -13.1              |
| Ort5        | L <sub>1</sub>  | 2.7        | -14.5 | -12.0        | 2.0          | -25.8                 | -23.2              |
|             | L <sub>2</sub>  | 0.4        | -14.0 | -10.6        | 4.2          | -18.8                 | -19.4              |
| Ort6        | L <sub>1</sub>  | 3.0        | -14.2 | -11.6        | 3.8          | -25.9                 | -18.1              |
|             | L <sub>2</sub>  | 2.8        | -11.6 | -8.4         | 5.5          | -19.0                 | -14.9              |
| Ort7        | L <sub>1</sub>  | 1.2        | -16.0 | -13.2        | 3.1          | -26.6                 | -20.5              |
|             | L <sub>2</sub>  | 0.4        | -14.0 | -10.6        | 4.3          | -18.8                 | -19.3              |
| Ort8        | L <sub>1</sub>  | 11.1       | -6.1  | -4.2         | 11.4         | -28.8                 | -6.2               |
|             | L <sub>2</sub>  | 9.1        | -5.3  | -2.6         | 11.3         | -21.3                 | -5.4               |
| Ort9        | L <sub>1</sub>  | 1.1        | -16.1 | -13.3        | 2.1          | -24.8                 | -20.2              |
|             | L <sub>2</sub>  | 1.0        | -13.4 | -10.2        | 4.1          | -18.3                 | -17.1              |
| Ort10       | L <sub>1</sub>  | 0.7        | -16.5 | -13.5        | 3.7          | -23.6                 | -23.9              |
|             | L <sub>2</sub>  | 0.7        | -13.7 | -10.3        | 5.1          | -17.5                 | -20.1              |
| Ort11       | L <sub>1</sub>  | 3.4        | -13.8 | -11.4        | 2.5          | -26.6                 | -16.2              |
|             | L <sub>2</sub>  | 3.2        | -11.2 | -8.3         | 3.4          | -19.6                 | -13.1              |
| Ort12       | L <sub>1</sub>  | 3.2        | -14.0 | -11.7        | 1.3          | -26.8                 | -16.3              |
|             | L <sub>2</sub>  | 3.0        | -11.3 | -8.5         | 2.7          | -19.8                 | -13.2              |
| Ort13       | L <sub>1</sub>  | 2.3        | -14.9 | -12.4        | 1.9          | -24.7                 | -18.3              |
|             | L <sub>2</sub>  | 2.4        | -12.0 | -8.9         | 3.7          | -18.3                 | -14.5              |
| Ort14       | L <sub>1</sub>  | 3.4        | -13.8 | -11.5        | 2.1          | -26.7                 | -16.1              |
|             | L <sub>2</sub>  | 3.1        | -11.2 | -8.3         | 3.0          | -19.6                 | -13.2              |
| Ort15       | L <sub>1</sub>  | 3.2        | -13.9 | -11.5        | 2.2          | -26.8                 | -16.3              |
|             | L <sub>2</sub>  | 1.7        | -12.7 | -9.5         | 3.8          | -19.7                 | -14.6              |

Ort 1 to Ort15 represent the different orientations in which one GdmCl molecule was optimized with the salt-bridge model complex. Please see Fig. S2 for the structures.

L<sub>1</sub>, L<sub>2</sub> and L<sub>3</sub> are the CPCM(water)/M06-2X/6-311G\*\*, CPCM(water)/M06-2X/6-311++G\*\* and CPCM(water)/MP2/6-311G\*\* levels of theory, respectively.

$\Delta E$  = Relative electronic energy of the given geometry with respect to the lowest energy one.

$E_b$ ,  $\Delta H_b$  and  $\Delta G_b$  are binding energy, enthalpy of binding and the free energy of binding, respectively.

$I_{ca\cdots an,osm}$  = Energy of interaction between cation and anion of the SB in osmolyte $\cdots$ SB complex

$I_{osm\cdots SB}$  = Energy of interaction between osmolyte and the SB in the osmolyte $\cdots$ SB complex

**Table S3** Energetics in kcal/mol of the noncovalent complex formed between the urea and the salt-bridge model complex

| Orientation | Level of theory | $\Delta E$ | $E_b$ | $\Delta H_b$ | $\Delta G_b$ | $I_{ca\cdots an,osm}$ | $I_{osm\cdots SB}$ |
|-------------|-----------------|------------|-------|--------------|--------------|-----------------------|--------------------|
| Ort1        | L <sub>1</sub>  | 0.1        | -12.5 | -10.0        | 3.8          | -26.2                 | -15.4              |
|             | L <sub>2</sub>  | 0.2        | -9.1  | -6.4         | 4.4          | -19.6                 | -11.1              |
| Ort2        | L <sub>1</sub>  | 0.4        | -12.2 | -9.8         | 4.6          | -27.0                 | -16.2              |
|             | L <sub>2</sub>  | 0.3        | -9.0  | -6.5         | 2.1          | -20.1                 | -10.6              |
| Ort3        | L <sub>1</sub>  | 1.8        | -10.9 | -8.9         | 2.1          | -27.6                 | -12.7              |
|             | L <sub>2</sub>  | 0.7        | -8.6  | -6.2         | 1.7          | -20.3                 | -9.9               |
| Ort4        | L <sub>1</sub>  | 0.9        | -11.7 | -9.6         | 1.6          | -27.8                 | -13.0              |
|             | L <sub>2</sub>  | 0.3        | -9.0  | -6.6         | 2.6          | -20.7                 | -9.9               |
| Ort5        | L <sub>1</sub>  | 1.8        | -10.8 | -9.0         | 1.8          | -27.5                 | -12.3              |
|             | L <sub>2</sub>  | 0.7        | -8.6  | -6.1         | 3.3          | -20.3                 | -9.9               |
| Ort6        | L <sub>1</sub>  | 1.0        | -11.6 | -9.8         | 0.2          | -27.8                 | -12.9              |
|             | L <sub>2</sub>  | 0.3        | -9.0  | -6.7         | 1.8          | -20.7                 | -9.9               |
|             | L <sub>3</sub>  | 0.1        | -10.9 | -9.1         | 0.9          | -28.2                 | -12.4              |
| Ort7        | L <sub>1</sub>  | 0.0        | -12.6 | -10.3        | 2.7          | -27.0                 | -15.1              |
|             | L <sub>2</sub>  | 0.0        | -9.3  | -6.6         | 4.1          | -19.9                 | -11.3              |
|             | L <sub>3</sub>  | 0.0        | -11.0 | -9.2         | 2.1          | -27.9                 | -13.1              |
| Ort8        | L <sub>1</sub>  | 3.5        | -9.1  | -7.5         | 2.6          | -28.3                 | -10.1              |
|             | L <sub>2</sub>  | 2.3        | -7.0  | -4.9         | 3.1          | -20.8                 | -7.8               |
| Ort9        | L <sub>1</sub>  | 2.4        | -10.2 | -8.7         | 0.8          | -28.2                 | -11.0              |
|             | L <sub>2</sub>  | 0.9        | -8.4  | -6.1         | 2.1          | -20.9                 | -9.0               |
| Ort10       | L <sub>1</sub>  | 2.7        | -10.0 | -8.2         | 2.0          | -26.9                 | -11.7              |
|             | L <sub>2</sub>  | 1.7        | -7.6  | -5.3         | 2.7          | -20.0                 | -8.8               |
| Ort11       | L <sub>1</sub>  | 1.6        | -11.0 | -9.1         | 2.0          | -26.6                 | -13.4              |
|             | L <sub>2</sub>  | 1.0        | -8.3  | -5.8         | 3.7          | -19.7                 | -10.0              |
| Ort12       | L <sub>1</sub>  | 5.8        | -6.9  | -5.4         | 3.8          | -28.3                 | -7.7               |
|             | L <sub>2</sub>  | 4.3        | -5.0  | -2.9         | 4.1          | -20.9                 | -5.7               |

Ort 1 to Ort12 represent the different orientations in which one urea molecule was optimized with the salt-bridge model complex. Please see Fig. S3 for the structures.

L<sub>1</sub>, L<sub>2</sub> and L<sub>3</sub> are the CPCM(water)/M06-2X/6-311G\*\*, CPCM(water)/M06-2X/6-311++G\*\* and CPCM(water)/MP2/6-311G\*\* levels of theory, respectively.

For the definition of the energy terms, please see the “Computational Methods” section in the main manuscript.

**Table S4** Energetics in kcal/mol of the noncovalent complex formed between the trimethylamine N-oxide and the salt-bridge model complex

| Orientation | Level of theory | $\Delta E$ | $E_b$ | $\Delta H_b$ | $\Delta G_b$ | $I_{ca\cdots an,osm}$ | $I_{osm\cdots SB}$ |
|-------------|-----------------|------------|-------|--------------|--------------|-----------------------|--------------------|
| Ort1        | L <sub>1</sub>  | 3.0        | -14.6 | -12.5        | -0.2         | -26.2                 | -18.6              |
|             | L <sub>2</sub>  | 3.9        | -9.3  | -6.8         | 2.1          | -19.3                 | -12.1              |
| Ort2        | L <sub>1</sub>  | 2.9        | -14.7 | -12.8        | -0.6         | -26.9                 | -17.2              |
|             | L <sub>2</sub>  | 3.3        | -9.9  | -7.7         | 1.8          | -19.9                 | -11.7              |
| Ort3        | L <sub>1</sub>  | 9.4        | -8.2  | -6.3         | 6.5          | -28.1                 | -8.9               |
|             | L <sub>2</sub>  | 8.9        | -4.4  | -2.1         | 8.0          | -21.0                 | -4.7               |
| Ort4        | L <sub>1</sub>  | 0.0        | -17.6 | -15.5        | -4.2         | -28.2                 | -18.8              |
|             | L <sub>2</sub>  | 0.0        | -13.2 | -10.6        | -1.1         | -20.8                 | -14.2              |
|             | L <sub>3</sub>  | 0.0        | -18.2 | -16.4        | -6.2         | -28.4                 | -19.8              |

Ort 1 to Ort4 represent different orientations in which one TMAO molecule was optimized with the salt-bridge model complex. Please see Fig. S4 for the structures.

L<sub>1</sub>, L<sub>2</sub> and L<sub>3</sub> are the CPCM(water)/M06-2X/6-311G\*\*, CPCM(water)/M06-2X/6-311++G\*\* and CPCM(water)/MP2/6-311G\*\* levels of theory, respectively.

$\Delta E$  = Relative electronic energy of the given geometry with respect to the lowest energy one.

$E_b$ ,  $\Delta H_b$  and  $\Delta G_b$  are binding energy, enthalpy of binding and the free energy of binding, respectively.

$I_{ca\cdots an,osm}$  = Energy of interaction between cation and anion of the SB in osmolyte $\cdots$ SB complex

$I_{osm\cdots SB}$  = Energy of interaction between osmolyte and the SB in the osmolyte $\cdots$ SB complex



**Table S5** Energetics in kcal/mol of the noncovalent complex formed between the glycerol and the salt-bridge model complex

| Orientation | Level of theory | $\Delta E$ | $E_b$        | $\Delta H_b$ | $\Delta G_b$ | $I_{ca\cdots an,osm}$ | $I_{osm\cdots SB}$ |
|-------------|-----------------|------------|--------------|--------------|--------------|-----------------------|--------------------|
| Ort1        | L <sub>1</sub>  | 1.0        | -15.4        | -13.2        | 0.7          | -25.9                 | -23.8              |
|             | L <sub>2</sub>  | 0.0        | -11.8        | -9.2         | 3.1          | -18.9                 | -18.5              |
|             | L <sub>3</sub>  | 0.1        | -14.8        | -12.9        | -0.4         | -26.8                 | -22.9              |
| Ort2        | L <sub>1</sub>  | 5.0        | -11.4        | -9.3         | 4.8          | -27.8                 | -17.2              |
|             | L <sub>2</sub>  | 3.3        | -8.6         | -6.1         | 5.4          | -20.5                 | -12.0              |
| Ort3        | L <sub>1</sub>  | 4.1        | -12.3        | -10.4        | 2.5          | -27.4                 | -15.9              |
|             | L <sub>2</sub>  | 2.7        | -9.1         | -6.8         | 4.0          | -20.1                 | -11.5              |
| Ort4        | L <sub>1</sub>  | 2.5        | -13.9        | -11.8        | 1.1          | -27.4                 | -17.9              |
|             | L <sub>2</sub>  | 1.7        | -10.2        | -7.7         | 1.9          | -20.5                 | -12.5              |
|             | L <sub>3</sub>  | 0.6        | -14.5        | -12.5        | -1.1         | -27.8                 | -18.3              |
| Ort5        | L <sub>1</sub>  | 4.15       | -12.2        | -10.3        | 3.7          | -28.1                 | -17.1              |
|             | L <sub>2</sub>  | 1.6        | -10.2        | -7.9         | 3.9          | -20.9                 | -13.4              |
| Ort6        | L <sub>1</sub>  | 1.1        | -15.3        | -13.2        | 1.4          | -26.4                 | -20.7              |
|             | L <sub>2</sub>  | 1.0        | -10.8        | -8.1         | 4.2          | -18.9                 | -15.3              |
| Ort7        | L <sub>1</sub>  | 1.4        | -15.0        | -12.9        | 0.9          | -26.9                 | -19.7              |
|             | L <sub>2</sub>  | 0.8        | -11.0        | -8.4         | 2.6          | -19.5                 | -14.4              |
| Ort8        | L <sub>1</sub>  | 3.4        | -13.0        | -10.8        | 4.4          | -26.7                 | -19.3              |
|             | L <sub>2</sub>  | 3.0        | -8.8         | -6.2         | 6.2          | -19.6                 | -13.2              |
| Ort9        | L <sub>1</sub>  | 1.8        | -14.6        | -12.3        | 2.1          | -26.5                 | -18.7              |
|             | L <sub>2</sub>  | 3.9        | -7.9         | -5.5         | 6.1          | -20.6                 | -11.5              |
| Ort10       | L <sub>1</sub>  | 5.9        | -10.5        | -8.3         | 5.9          | -27.3                 | -16.1              |
|             | L <sub>2</sub>  | 1.3        | -10.5        | -7.9         | 3.7          | -19.6                 | -13.2              |
| Ort11       | L <sub>1</sub>  | 7.9        | -8.5         | -7.0         | 6.2          | -28.3                 | -16.3              |
|             | L <sub>2</sub>  | 5.5        | -6.3         | -4.3         | 6.9          | -20.9                 | -12.1              |
| Ort12       | L <sub>1</sub>  | <b>0.0</b> | <b>-16.4</b> | <b>-14.1</b> | <b>0.9</b>   | <b>-25.9</b>          | <b>-24.4</b>       |
|             | L <sub>2</sub>  | 0.4        | -11.4        | -8.8         | 3.1          | -19.0                 | -17.7              |
|             | L <sub>3</sub>  | <b>0.0</b> | <b>14.9</b>  | <b>-12.9</b> | <b>0.5</b>   | <b>-26.4</b>          | <b>-22.2</b>       |

Ort 1 - Ort12 represent different orientations in which one glycerol molecule was optimized with the salt-bridge. Please see Fig. S5 for the structures.

L<sub>1</sub>, L<sub>2</sub> and L<sub>3</sub> are the CPCM(water)/M06-2X/6-311G\*\*, CPCM(water)/M06-2X/6-311++G\*\* and CPCM(water)/MP2/6-311G\*\* levels of theory, respectively.

For the definition of energy terms, please see the “Computational Methods” section in the main manuscript.

**Table S6** Energetics in kcal/mol of the noncovalent complex formed between two guanidinium ions and the salt-bridge model complex

| Orientation | Level of theory | $\Delta E$ | $E_b$ | $\Delta H_b$ | $\Delta G_b$ | $I_{ca\cdots an,osm}$ | $I_{osm\cdots SB}$ |
|-------------|-----------------|------------|-------|--------------|--------------|-----------------------|--------------------|
| Ort1        | L <sub>1</sub>  | 0.0        | -27.5 | -23.4        | 0.5          | -23.4                 | -33.9              |
|             | L <sub>2</sub>  | 0.0        | -22.7 | -18.2        | 4.5          | -17.4                 | -27.9              |
| Ort2        | L <sub>1</sub>  | 0.0        | -27.5 | -23.7        | -1.1         | -24.0                 | -33.3              |
|             | L <sub>2</sub>  | 0.1        | -22.6 | -18.7        | 1.6          | -17.9                 | -27.6              |
| Ort3        | L <sub>1</sub>  | 8.4        | -19.1 | -15.3        | 8.7          | -23.9                 | -20.9              |
|             | L <sub>2</sub>  | 7.6        | -15.1 | -11.0        | 11.3         | -17.9                 | -16.5              |
| Ort4        | L <sub>1</sub>  | 0.0        | -27.5 | -23.7        | -1.4         | -26.3                 | -30.6              |
|             | L <sub>2</sub>  | 0.2        | -22.5 | -18.7        | 0.7          | -19.8                 | -25.1              |

Ort 1 to Ort4 represent different orientations in which two Gdm<sup>+</sup> ions were optimized with the salt-bridge model complex. Please see Fig. S6 for the structures.

L<sub>1</sub> and L<sub>2</sub> are the CPCM(water)/M06-2X/6-311G\*\* and CPCM(water)/M06-2X/6-311++G\*\* levels of theory, respectively.

$\Delta E$  = Relative electronic energy of the given geometry with respect to the lowest energy one.

$E_b$ ,  $\Delta H_b$  and  $\Delta G_b$  are binding energy, enthalpy of binding and the free energy of binding, respectively.

$I_{ca\cdots an,osm}$  = Energy of interaction between cation and anion of the SB in osmolyte $\cdots$ SB complex

$I_{osm\cdots SB}$  = Energy of interaction between osmolyte and the SB in the osmolyte $\cdots$ SB complex

**Table S7** Energetics in kcal/mol of the noncovalent complex formed between two trimethylamine N-oxide molecules and the salt-bridge model complex

| Orientation | Level of theory | $\Delta E$ | $E_b$ | $\Delta H_b$ | $\Delta G_b$ | $I_{ca\cdots an,osm}$ | $I_{osm\cdots SB}$ |
|-------------|-----------------|------------|-------|--------------|--------------|-----------------------|--------------------|
| Ort1        | L <sub>1</sub>  | 9.5        | -22.6 | -18.8        | 4.0          | -26.7                 | -23.0              |
|             | L <sub>2</sub>  | 7.8        | -14.5 | -10.6        | 10.6         | -19.9                 | -15.2              |
| Ort2        | L <sub>1</sub>  | 0.0        | -32.1 | -27.5        | -3.0         | -25.5                 | -37.2              |
|             | L <sub>2</sub>  | 0.5        | -21.9 | -17.7        | 3.9          | -18.8                 | -25.9              |
| Ort3        | L <sub>1</sub>  | 5.7        | -26.4 | -22.5        | 0.3          | -27.3                 | -33.3              |
|             | L <sub>2</sub>  | 3.8        | -18.5 | -14.4        | 6.7          | -20.7                 | -19.3              |
| Ort4        | L <sub>1</sub>  | 0.6        | -31.5 | -27.6        | -5.3         | -26.4                 | -35.0              |
|             | L <sub>2</sub>  | 0.0        | -22.4 | -18.5        | -0.4         | -19.6                 | -24.8              |
| Ort5        | L <sub>1</sub>  | 10.1       | -22.0 | -18.6        | 5.5          | -27.2                 | -33.7              |
|             | L <sub>2</sub>  | 7.8        | -14.6 | -10.8        | 10.3         | -20.1                 | -15.7              |

Ort1 to Ort5 represent different orientations in which two TMAO molecules were optimized with the salt-bridge model complex. Please see Fig. S7 for the structures.

L<sub>1</sub> and L<sub>2</sub> are the CPCM(water)/M06-2X/6-311G\*\* and CPCM(water)/M06-2X/6-311++G\*\* levels of theory, respectively.

$\Delta E$  = Relative electronic energy of the given geometry with respect to the lowest energy one.

$E_b$ ,  $\Delta H_b$  and  $\Delta G_b$  are binding energy, enthalpy of binding and the free energy of binding, respectively.

$I_{ca\cdots an,osm}$  = Energy of interaction between cation and anion of the SB in osmolyte $\cdots$ SB complex

$I_{osm\cdots SB}$  = Energy of interaction between osmolyte and the SB in the osmolyte $\cdots$ SB complex

**Table S8** Energetics in kcal mol<sup>-1</sup> for the adsorption of the second molecule of osmolytes on the salt-bridge model complex (the minimum energy geometries)

| Level of theory | Osmolyte         | $E_b$ | $\Delta H_b$ | $\Delta G_b$ | $K_{A2}$ (M <sup>-1</sup> ) |
|-----------------|------------------|-------|--------------|--------------|-----------------------------|
| L <sub>1</sub>  | Gdm <sup>+</sup> | -11.7 | -10.0        | 1.8          | $4.8 \times 10^{-2}$        |
|                 | TMAO             | -14.5 | -12.0        | 1.2          | $1.3 \times 10^{-1}$        |
| L <sub>2</sub>  | Gdm <sup>+</sup> | -10.0 | -7.8         | 4.4          | $6.0 \times 10^{-4}$        |
|                 | TMAO             | -9.1  | -7.9         | 0.7          | $3.1 \times 10^{-1}$        |

L<sub>1</sub> and L<sub>2</sub> are the CPCM(water)/M06-2X/6-311G\*\* and CPCM(water)/M06-2X/6-311++G\*\* levels of theory, respectively.

$E_b$ ,  $\Delta H_b$  and  $\Delta G_b$  are binding energy, enthalpy of binding and the free energy of binding, respectively.

$K_{A2}$  = Computed association constant for the adsorption of the second molecule of the osmolyte on the SB

**Table S9** Energetics in kcal mol<sup>-1</sup> of binding of osmolytes with the free acetate ion

| Level of theory | Osmolyte         | $E_b$ | $\Delta H_b$ | $\Delta G_b$ | $K_{A,osm...an}$ ( $M^{-1}$ ) |
|-----------------|------------------|-------|--------------|--------------|-------------------------------|
| L <sub>1</sub>  | Gdm <sup>+</sup> | -26.6 | -26.0        | -15.7        | $3.1 \times 10^{11}$          |
|                 | Urea             | -17.6 | -16.5        | -7.3         | $2.2 \times 10^5$             |
|                 | Glycerol         | -21.3 | -20.4        | -9.4         | $7.6 \times 10^6$             |
| L <sub>2</sub>  | Gdm <sup>+</sup> | -19.8 | -18.6        | -10.1        | $2.5 \times 10^7$             |
|                 | Urea             | -12.6 | -10.8        | -2.8         | $1.1 \times 10^2$             |
|                 | Glycerol         | -15.9 | -14.4        | -5.6         | $1.3 \times 10^4$             |
| L <sub>3</sub>  | Gdm <sup>+</sup> | -27.2 | -26.2        | -14.7        | $5.8 \times 10^{10}$          |
|                 | Urea             | -17.2 | -15.8        | -5.8         | $1.8 \times 10^4$             |
|                 | Glycerol         | -21.3 | -20.0        | -9.4         | $7.7 \times 10^6$             |

L<sub>1</sub> and L<sub>2</sub> are the CPCM(water)/M06-2X/6-311G\*\* and CPCM(water)/M06-2X/6-311++G\*\* levels of theory, respectively.

$E_b$ ,  $\Delta H_b$  and  $\Delta G_b$  are binding energy, enthalpy of binding and the free energy of binding, respectively.

$K_{A,osm...an}$  = Computed association constant for binding of TMAO with free MeGdm<sup>+</sup> ion

**Table S10** Energetics in kcal/mol of binding of TMAO with the free MeGdm<sup>+</sup> ion

| Orientation | Level of theory | $\Delta E$ | $E_b$ | $\Delta H_b$ | $\Delta G_b$ | $K_{a,osm...an}$ (M <sup>-1</sup> ) |
|-------------|-----------------|------------|-------|--------------|--------------|-------------------------------------|
| Ort1        | L <sub>1</sub>  | 0.0        | -20.3 | -18.7        | -8.1         | $8.6 \times 10^5$                   |
|             | L <sub>2</sub>  | 0.0        | -15.5 | -14.5        | -4.8         | $3.9 \times 10^4$                   |
|             | L <sub>3</sub>  | 0.0        | -21.1 | -19.7        | -8.9         | $3.3 \times 10^6$                   |
| Ort2        | L <sub>1</sub>  | 0.1        | -20.2 | -18.5        | -7.9         | –                                   |
|             | L <sub>2</sub>  | 0.1        | -15.4 | -14.4        | -5.1         | –                                   |
|             | L <sub>3</sub>  | 0.6        | -20.5 | -19.1        | -8.0         | –                                   |

L<sub>1</sub>, L<sub>2</sub> and L<sub>3</sub> represent CPCM(water)/M06-2X/6-311G\*\*, CPCM(water)/M06-2X/6-311++G\*\* and CPCM(water)/MP2/6-311G\*\* levels of theory, respectively.

$E_b$ ,  $\Delta H_b$  and  $\Delta G_b$  are binding energy, enthalpy of binding and the free energy of binding, respectively. For the definition, please see the “Computational Methods” section.

$\Delta E$  = Relative electronic energy of the two conformers shown in the below figure.

$K_{A,osm...an}$  = Computed association constant for binding of TMAO with free MeGdm<sup>+</sup> ion

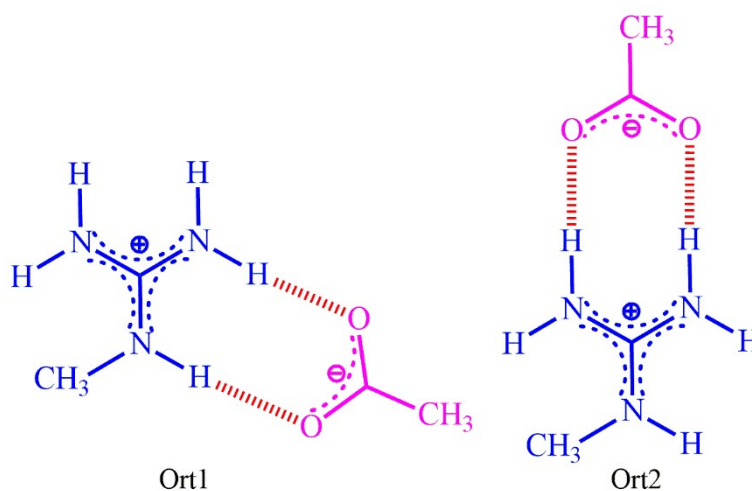

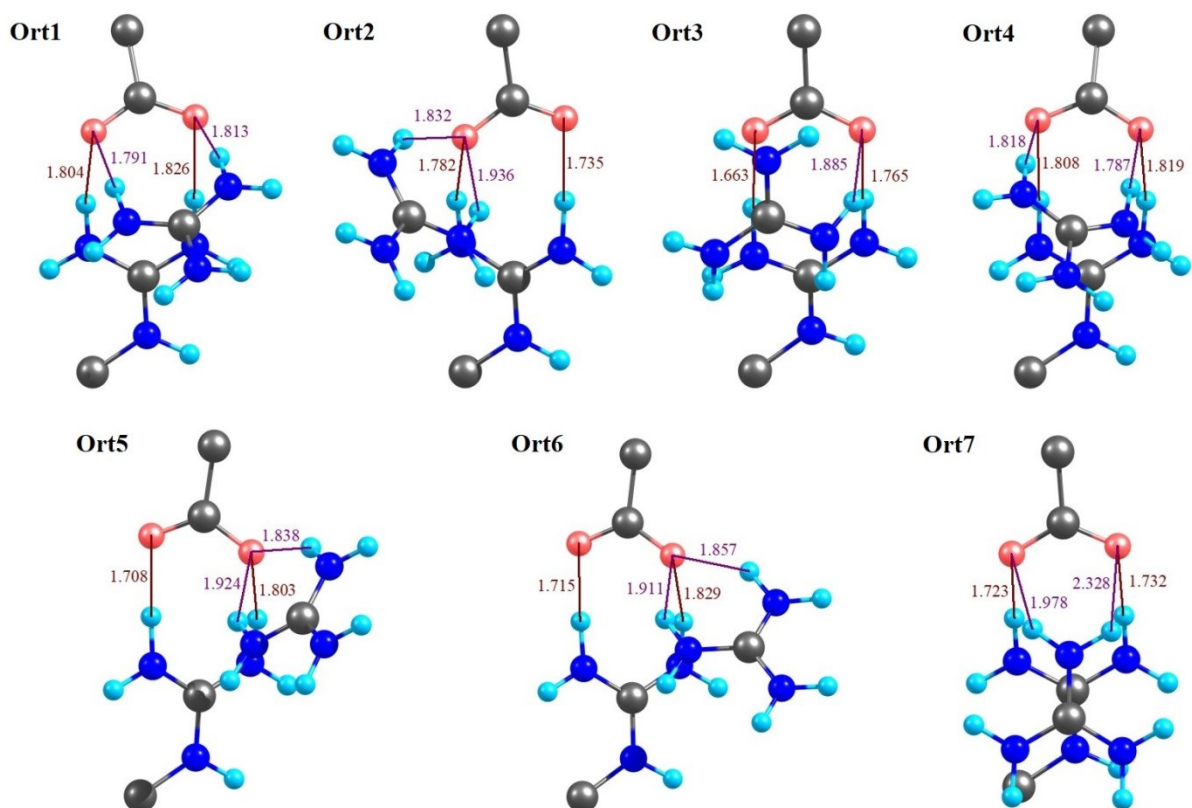

**Fig. S1** Optimized geometries at the CPCM(water)/M06-2X/6-311G\*\* level of theory of the salt-bridge model complex in the presence of one guanidinium ion ( $\text{Gdm}^+$ ). Ort1 to Ort7 represent the different orientations in which  $\text{Gdm}^+$  is optimized with the salt-bridge model complex. Colour scheme: black – carbon, cyan – hydrogen, blue – nitrogen, red – oxygen, maroon line – salt-bridge hydrogen bond, purple line – hydrogen bond between the  $\text{Gdm}^+$  and the salt-bridge model complex.

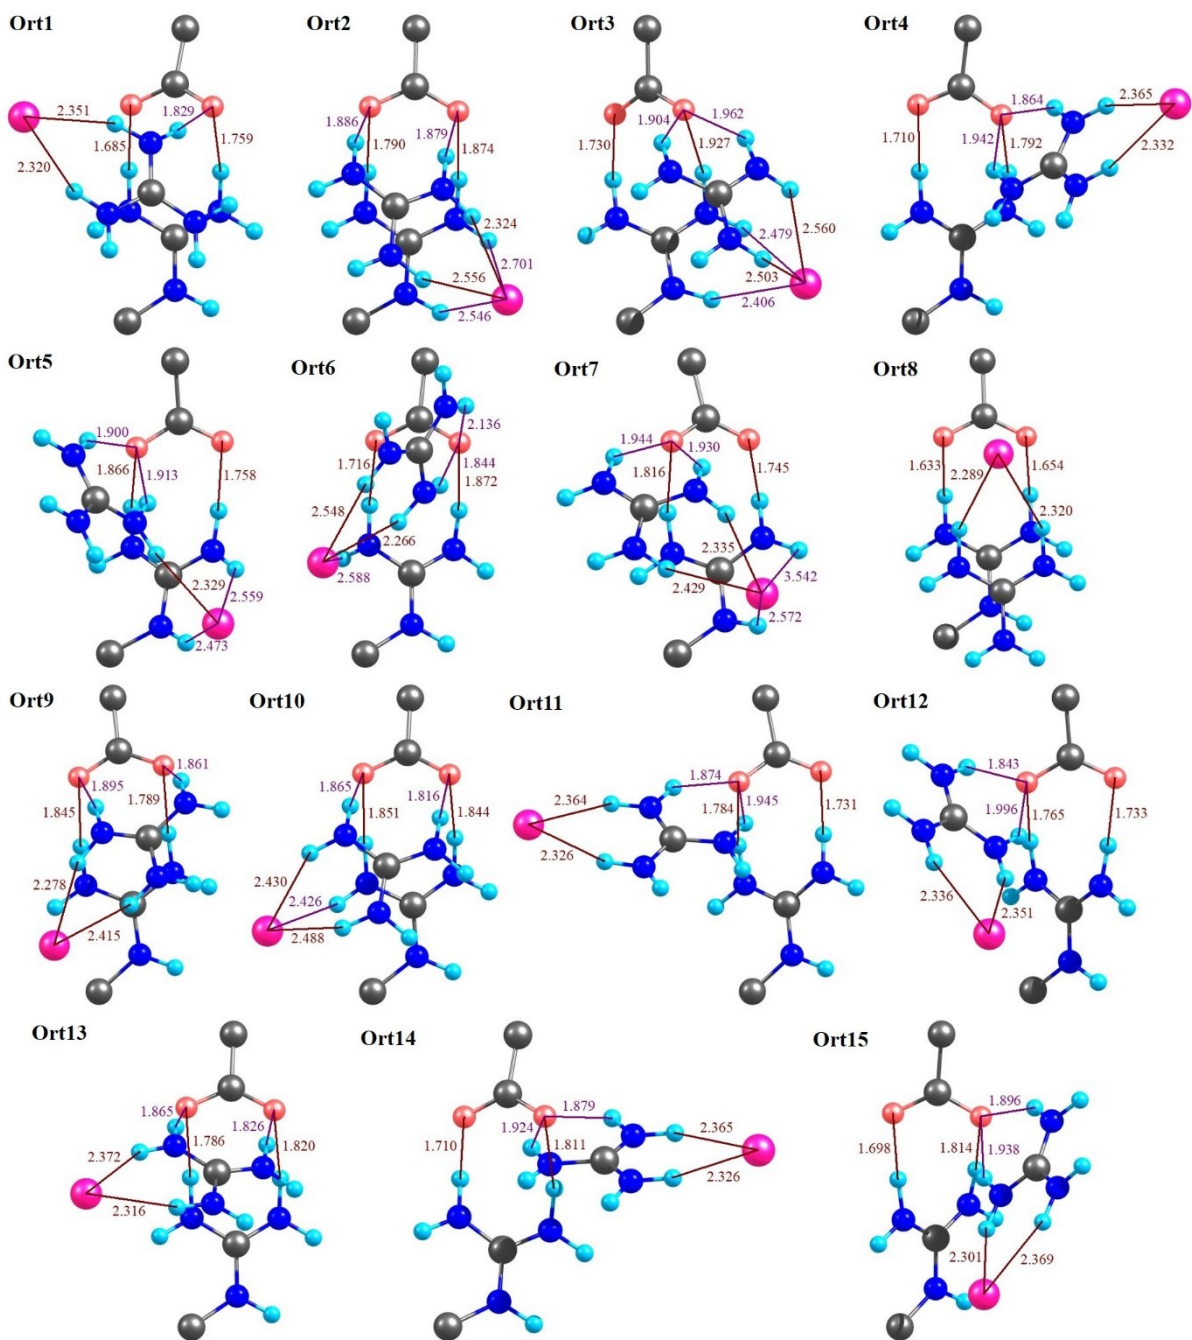

**Fig. S2** Optimized geometries at the CPCM(water)/M06-2X/6-311G\*\* level of theory of the salt-bridge model complex in the presence of one molecule of guanidinium chloride (GdmCl). Ort1 to Ort15 represent the different orientations in which the GdmCl is optimized with the salt-bridge model complex. Colour scheme: black – carbon, cyan – hydrogen, blue – nitrogen, red – oxygen, pink – chloride, maroon line – salt-bridge hydrogen bond and the hydrogen bond between the chloride and the Gdm<sup>+</sup> ion, purple line – hydrogen bond between the GdmCl and the salt-bridge model complex.



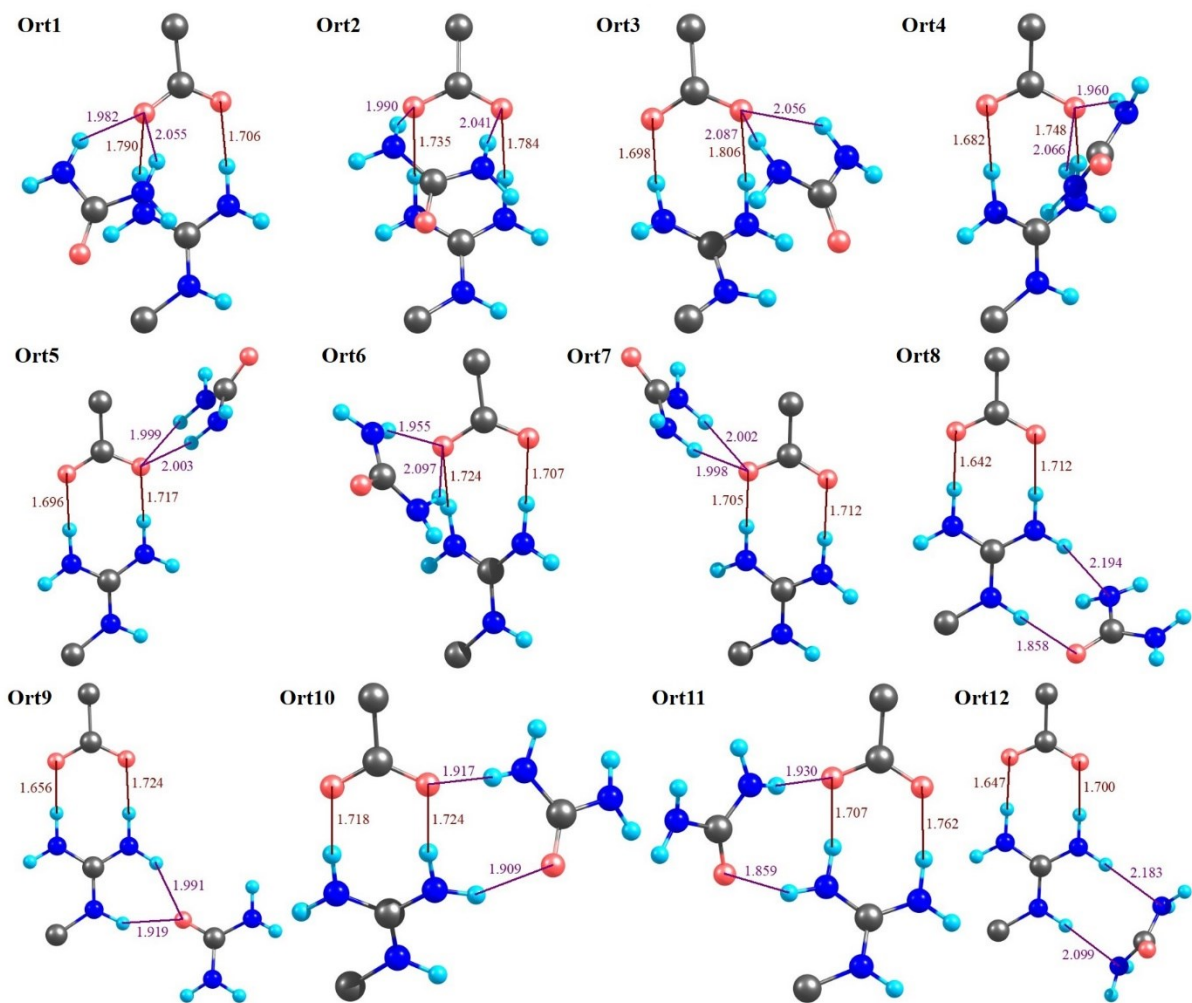

**Fig. S3** Optimized geometries at the CPCM(water)/M06-2X/6-311G\*\* level of theory of the salt-bridge model complex in the presence of one molecule of urea. Ort1 to Ort12 represent the different orientations in which the urea molecule is optimized with the salt-bridge model complex. Colour scheme: black – carbon, cyan – hydrogen, blue – nitrogen, red – oxygen, maroon line – salt-bridge hydrogen bond, purple line – hydrogen bond between the urea and the salt-bridge model complex.

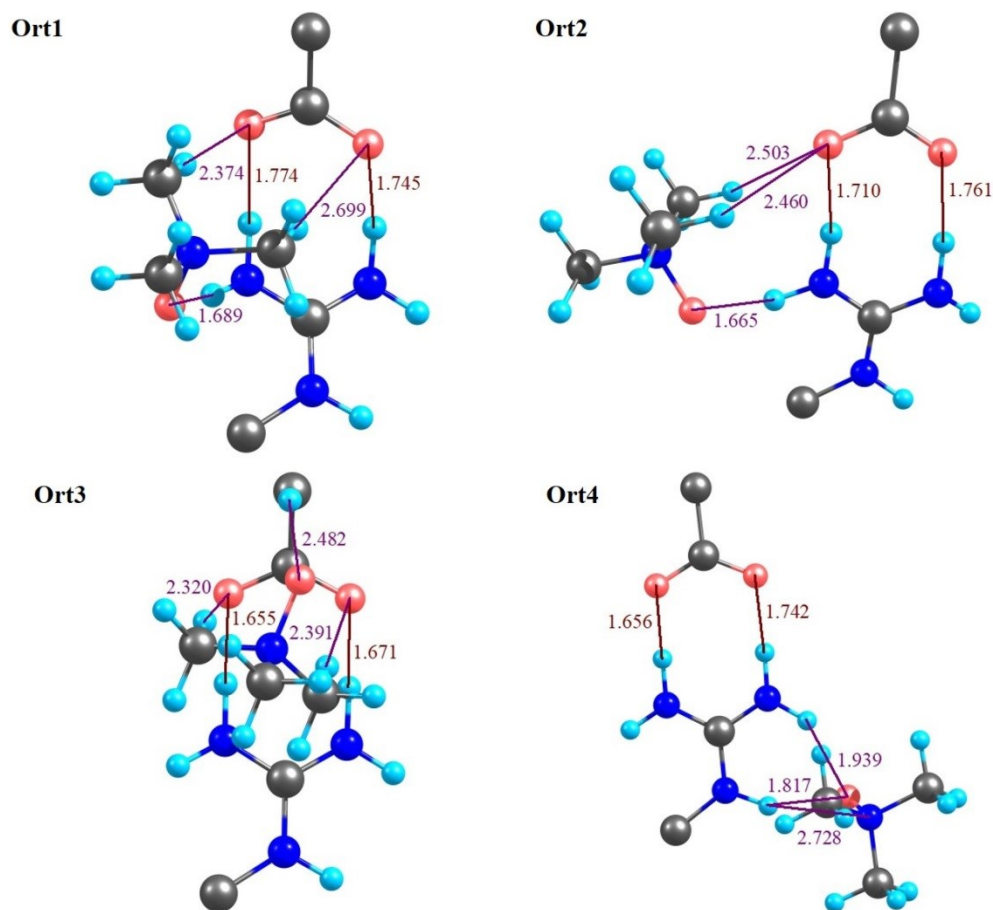

**Fig. S4** Optimized geometries at the CPCM(water)/M06-2X/6-311G\*\* level of theory of the salt-bridge model complex in the presence of one molecule of trimethylamine N-oxide (TMAO). Ort1 to Ort4 represent the different orientations in which the TMAO molecule is optimized with the salt-bridge model complex. Colour scheme: black – carbon, cyan – hydrogen, blue – nitrogen, red – oxygen, maroon line – salt-bridge hydrogen bond, purple line – hydrogen bond between the TMAO and the salt-bridge model complex.

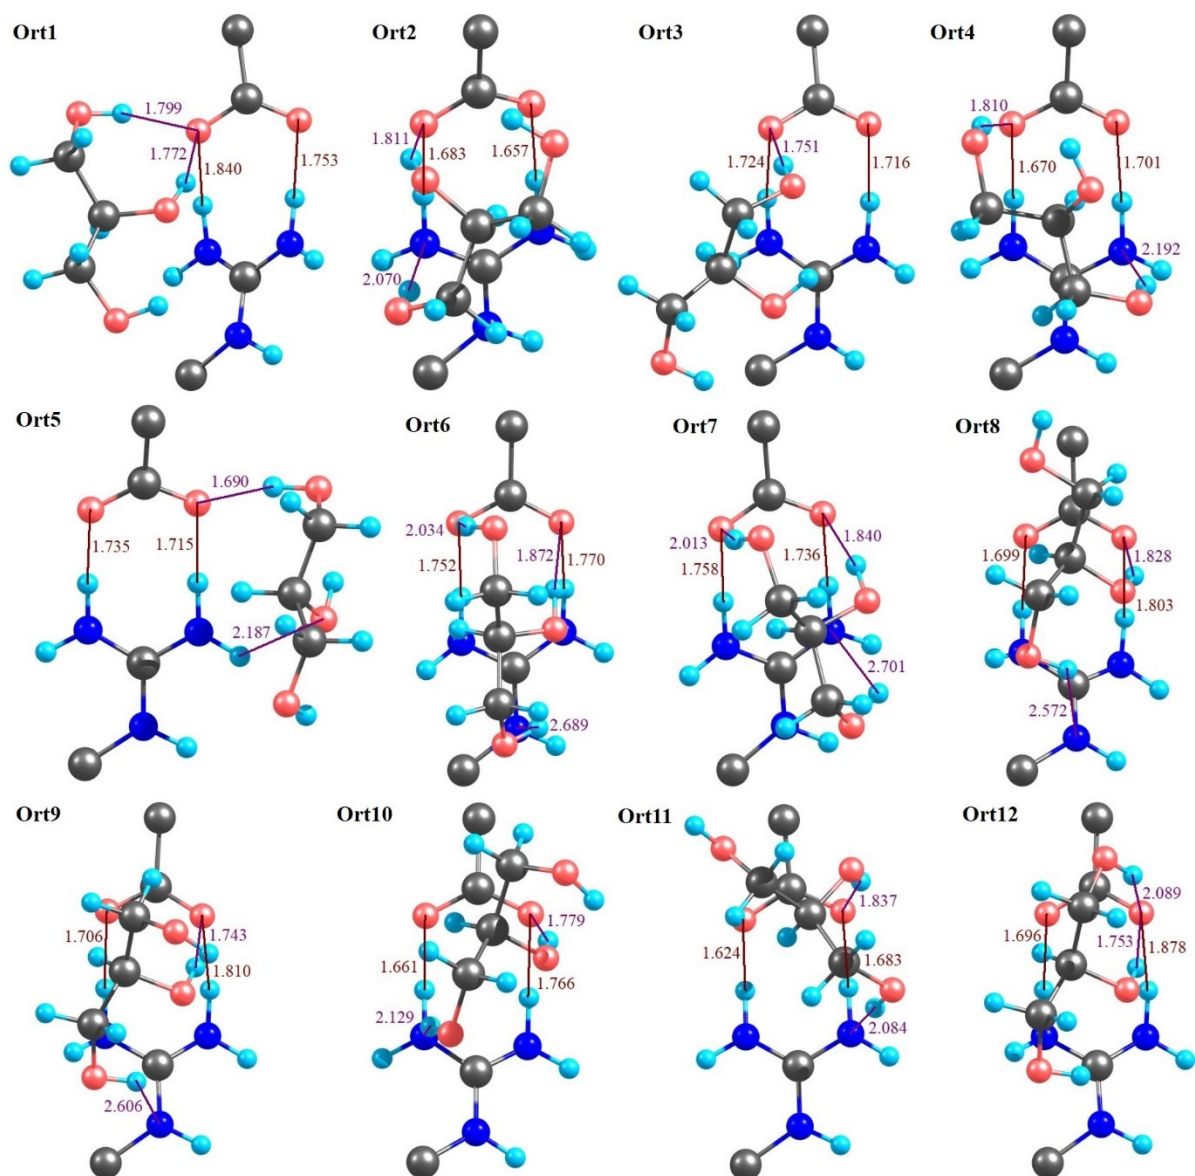

**Fig. S5** Optimized geometries at the CPCM(water)/M06-2X/6-311G\*\* level of theory of the salt-bridge model complex in the presence of one molecule of glycerol. Ort1 to Ort12 represent the different orientations in which the glycerol molecule is optimized with the salt-bridge model complex. Colour scheme: black – carbon, cyan – hydrogen, blue – nitrogen, red – oxygen, maroon line – salt-bridge hydrogen bond, purple line – hydrogen bond between the glycerol and the salt-bridge model complex.

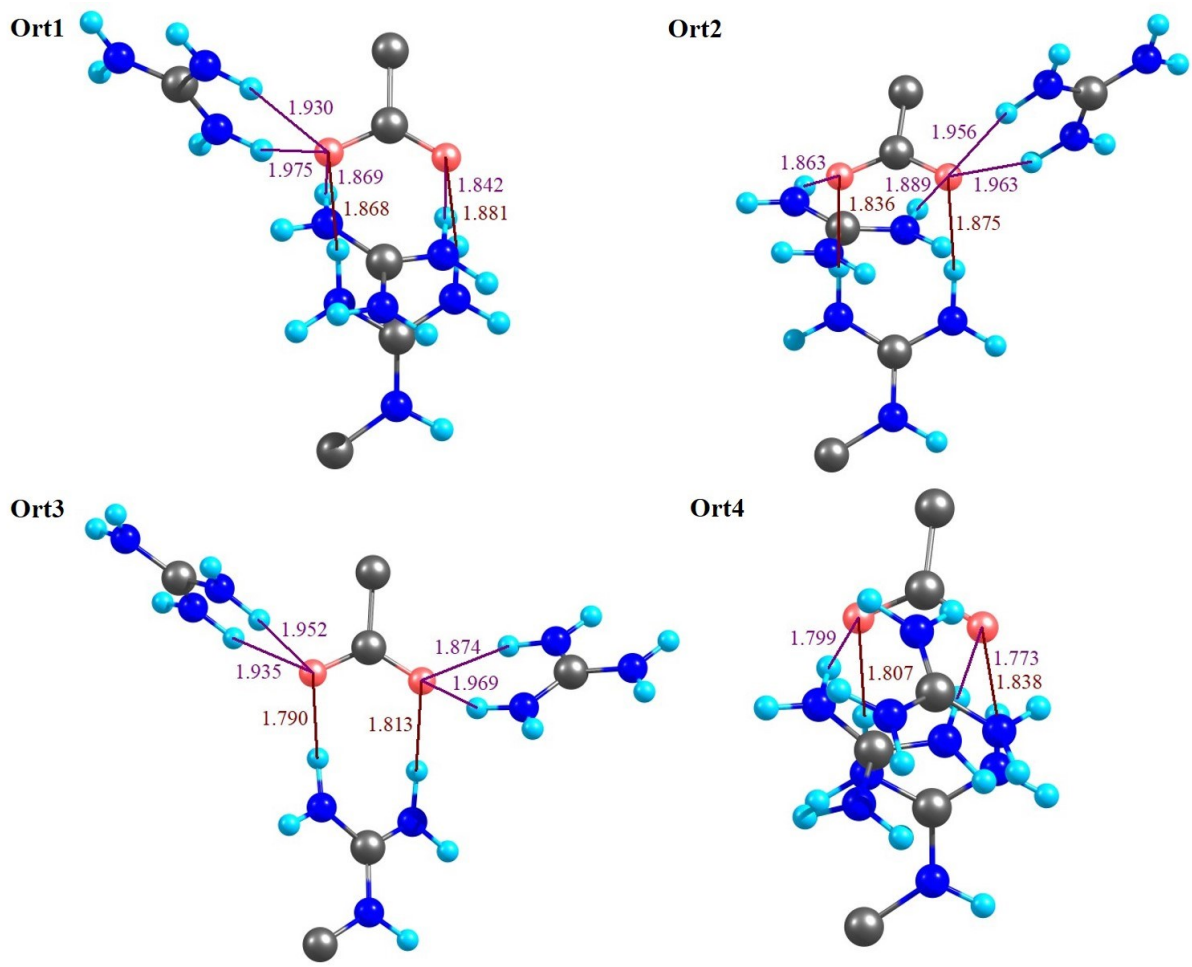

**Fig. S6** Optimized geometries at the CPCM(water)/M06-2X/6-311G\*\* level of theory of the salt-bridge model complex in the presence of two guanidinium ions (Gdm<sup>+</sup>). Ort1 to Ort4 represent the different orientations in which the two Gdm<sup>+</sup> ions are optimized with the salt-bridge model complex. Colour scheme: black – carbon, cyan – hydrogen, blue – nitrogen, red – oxygen, maroon line – salt-bridge hydrogen bond, purple line – hydrogen bond between the Gdm<sup>+</sup> and the salt-bridge model complex.

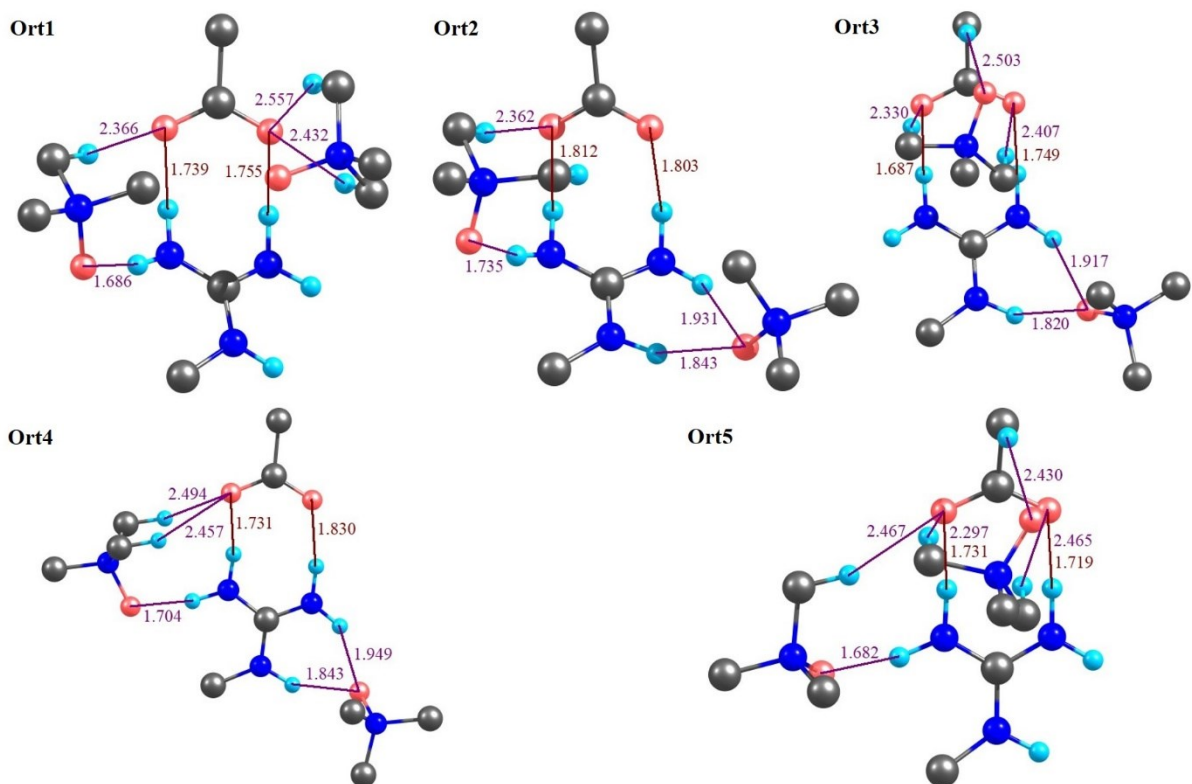

**Fig. S7** Optimized geometries at the CPCM(water)/M06-2X/6-311G\*\* level of theory of the salt-bridge model complex in the presence of two molecules of trimethylamine N-oxide (TMAO). Ort1 to Ort5 represent the different orientations in which two TMAO molecules are optimized with the salt-bridge model complex. Colour scheme: black – carbon, cyan – hydrogen, blue – nitrogen, red – oxygen, maroon line – salt-bridge hydrogen bond, purple line – hydrogen bond between the TMAO and the salt-bridge model complex.

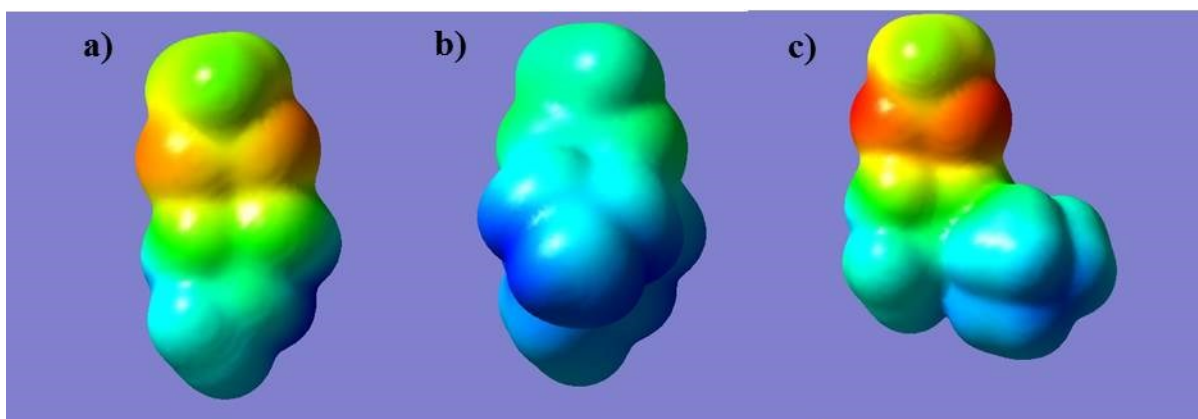

**Fig. S8** The molecular surface electrostatic potential computed on the 0.0004 au contour of electron density at the CPCM(water)/M06-2X/6-311++G\*\* level of theory: a) model salt-bridge, b) Gdm<sup>+</sup>···SB complex, and d) TMAO···SB complex. The blue colour on potential surfaces indicates a positive electrostatic potential. The transition from negative to positive potential is represented by red to yellow to green to blue.

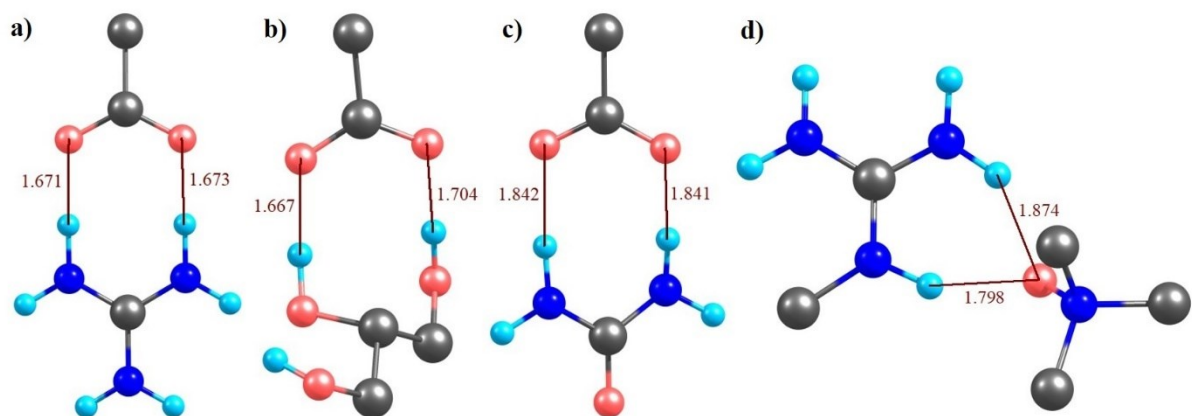

**Fig. S9** Optimized geometries at the CPCM(water)/M06-2X/6-311++G\*\* level of theory. a) Gdm<sup>+</sup>...acetate, b) glycerol...acetate, c) urea...acetate and d) TMAO...MeGdm<sup>+</sup> complexes in their lowest energy conformations. Colour scheme: carbon–black, hydrogen–cyan, nitrogen–blue, oxygen–red, maroon line represents hydrogen bond. Hydrogen atoms from methyl/methylene groups have been removed for the clarity.

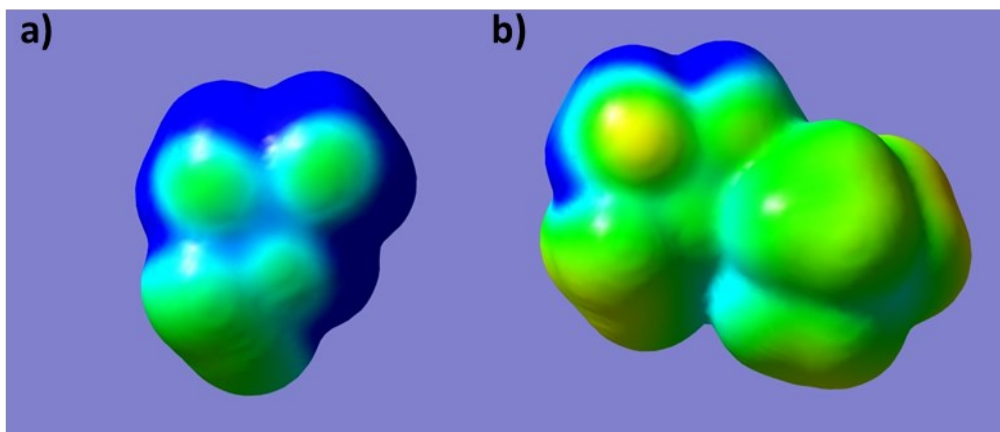

**Fig. S10** The molecular surface electrostatic potential computed on the 0.0004 au contour of electron density at the CPCM(water)/M06-2X/6-311++G\*\* level of theory: a) MeGdm<sup>+</sup>, b) MeGdm<sup>+</sup>···TMAO complex. The red colour on potential surfaces indicates a negative and blue colour a positive electrostatic potential. The transition from negative to positive potential is represented by red to yellow to green to blue. The TMAO is at the right hand side in Figure b.



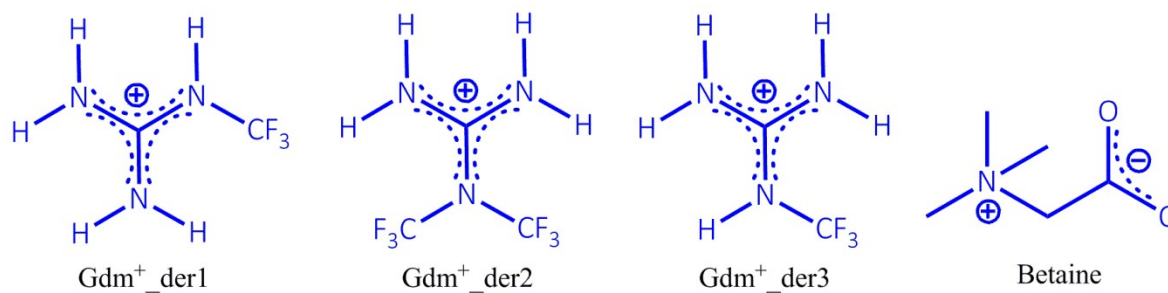

**Fig. S11** Schematic representations of designed Gdm<sup>+</sup>-based osmolytes (a-c) and the glycine betaine (d). Energy of interactions in kcal mol<sup>-1</sup> between different interacting units in osmolyte...SB complex is provided in the following table.

|                  | Gdm <sup>+</sup> _der1 | Gdm <sup>+</sup> _der2 | Gdm <sup>+</sup> _der3 | Betaine |
|------------------|------------------------|------------------------|------------------------|---------|
| $I_{os...an,ca}$ | -28.9                  | -22.6                  | -26.6                  | 0.2     |
| $I_{ca...an,os}$ | -16.1                  | -17.1                  | -16.4                  | -20.5   |

$I_{os...an,ca}$  = Energy of interaction between osmolyte and anion in the osmolyte...SB complex

$I_{ca...an,os}$  = Energy of interaction between cation and anion of the SB in osmolyte...SB complex



N 0.142988 2.273280 -0.598809  
 C -0.698416 1.899249 0.417127  
 N -0.113493 1.177858 1.420700  
 O -1.876038 2.244548 0.459936  
 H 4.494633 -0.648258 -1.184365  
 H -4.469555 -0.805983 -0.352974  
 H 4.419604 0.806092 -0.195518  
 H 4.634781 -0.771529 0.594981  
 H -3.251171 0.428365 -0.717987  
 H -3.419721 -1.023679 -1.757517  
 H -2.895098 -1.820914 0.947424  
 H -1.286665 -0.175636 -1.700248  
 H 0.327336 -0.548747 -1.153208  
 H -0.796455 -2.319228 1.661948  
 H 0.579379 -1.670876 0.828779  
 H -0.336470 2.646549 -1.403873  
 H 0.936436 1.671953 -0.806315  
 H 0.737088 0.644780 1.259670  
 H -0.761548 0.781570 2.083718

Urea\_Orientation2

C 4.114612 -0.064160 -0.368281  
 C 2.684682 -0.432722 -0.006087  
 O 1.864156 0.524215 0.124022  
 O 2.394236 -1.639948 0.136602  
 N -0.309583 -1.974509 -0.119110  
 C -1.057636 -1.085600 0.519155  
 N -0.468959 -0.293335 1.431103  
 N -2.376561 -1.008028 0.321943  
 C -3.094252 -1.906499 -0.569465  
 N -0.542125 1.301992 -1.372311  
 C -1.008976 1.994398 -0.287740  
 O -2.200903 2.034101 0.014991  
 N -0.047999 2.682035 0.399473  
 H 4.755542 -0.943080 -0.386531  
 H -4.159771 -1.753046 -0.420365  
 H 4.119384 0.413938 -1.350024  
 H 4.495934 0.663117 0.350022  
 H -2.855857 -1.722819 -1.620996  
 H -2.857254 -2.941147 -0.318945  
 H -2.798691 -0.113023 0.542546  
 H -0.678931 -2.440891 -0.932813  
 H 0.725678 -1.932888 0.013062  
 H -1.057359 0.408489 1.857619  
 H 0.481706 0.012650 1.168569  
 H -1.212749 0.675517 -1.790663  
 H 0.412189 0.960454 -1.310606  
 H 0.900756 2.325534 0.351267  
 H -0.344482 3.050672 1.289759

Urea\_Orientation3

C 4.282884 -0.926749 -0.633511  
 N 3.459960 -0.521895 0.495679  
 C 2.300277 0.126945 0.368955  
 N 1.628185 0.528360 1.448509  
 N 1.801005 0.393870 -0.833569  
 O -0.314450 2.100151 -1.056403  
 C -1.172291 1.895085 -0.174830  
 O -0.999620 1.142027 0.833931  
 C -2.533998 2.554945 -0.302128  
 N -2.864464 -1.069347 0.819082  
 C -2.238110 -1.898885 -0.067458  
 O -2.797936 -2.845766 -0.607535  
 N -0.903693 -1.628268 -0.244220  
 H -2.565105 3.234853 -1.150512  
 H 5.199222 -1.360407 -0.243083  
 H -3.287956 1.774141 -0.429814  
 H -2.769202 3.088981 0.619395  
 H 3.776828 -1.676379 -1.246170  
 H 4.545373 -0.064174 -1.249202  
 H 3.759381 -0.774879 1.423884  
 H 2.298616 0.102213 -1.658724  
 H 0.997516 1.055073 -0.932233

H 1.969522 0.290645 2.365637  
 H 0.645942 0.827447 1.329985  
 H -0.577695 -0.700277 -0.002195  
 H -0.479106 -2.068855 -1.044402  
 H -3.867037 -1.146174 0.861811  
 H -2.429777 -0.180581 1.051139

Urea\_Orientation4

C 1.864659 2.272891 -0.076721  
 C 0.544957 1.516815 -0.049502  
 O 0.620411 0.247610 -0.042665  
 O -0.517810 2.165088 -0.035533  
 N -2.883543 0.800370 0.153548  
 C -2.895566 -0.514112 -0.031476  
 N -1.744166 -1.156120 -0.207136  
 N -4.053030 -1.184969 -0.047213  
 C -5.351277 -0.548718 0.107002  
 N 3.109692 -0.869390 -1.110906  
 C 3.822399 -0.922409 0.057206  
 O 5.036484 -1.085505 0.092656  
 N 3.045347 -0.854376 1.182849  
 H 1.697822 3.347628 -0.068569  
 H -6.116293 -1.309896 -0.018475  
 H 2.466999 1.984276 0.787359  
 H 2.426820 1.992720 -0.970026  
 H -5.463720 -0.103774 1.098573  
 H -5.500123 0.217098 -0.657057  
 H -4.014293 -2.189306 -0.113898  
 H -3.739878 1.292133 0.346608  
 H -1.988259 1.328117 0.092741  
 H -1.745189 -2.140730 -0.416655  
 H -0.844289 -0.642334 -0.148305  
 H 2.110692 -0.469016 1.085888  
 H 3.540589 -0.697480 2.045246  
 H 3.653061 -0.722391 -1.945627  
 H 2.172251 -0.479998 -1.070514

Urea\_Orientation5

C -2.658979 -2.525342 0.204783  
 C -1.254574 -1.967194 0.054604  
 O -0.928595 -1.037036 0.857730  
 O -0.510344 -2.421724 -0.836089  
 N 1.579795 -0.686893 -1.252066  
 C 2.255842 -0.230103 -0.196791  
 N 3.424651 0.393790 -0.357457  
 C 4.172447 0.994143 0.736288  
 N 1.735273 -0.392268 1.015369  
 N -2.746986 1.186678 0.678595  
 C -2.068663 2.049595 -0.131091  
 O -2.528210 3.126099 -0.496190  
 N -0.818660 1.618821 -0.497065  
 H -2.793497 -2.900707 1.220478  
 H 5.033639 1.504199 0.314052  
 H -3.374914 -1.713285 0.058127  
 H -2.846395 -3.319133 -0.514835  
 H 3.560861 1.728629 1.263904  
 H 4.526811 0.236931 1.439181  
 H 3.826046 0.410562 -1.281367  
 H 2.210904 -0.035398 1.827186  
 H 0.746141 -0.693761 1.083392  
 H 1.984301 -0.593983 -2.170274  
 H 0.805048 -1.368905 -1.111368  
 H -0.419680 2.072787 -1.302529  
 H -0.581139 0.647249 -0.341890  
 H -2.272869 0.369562 1.052142  
 H -3.563009 1.549049 1.141806

Urea\_Orientation6

C -1.997496 2.261063 -0.179222  
 C -0.607536 1.649188 -0.093953  
 O 0.381819 2.403730 -0.089136  
 O -0.551722 0.379794 -0.029511

N 1.933627 -0.777319 -0.151056  
 C 3.009432 -0.029384 0.063461  
 N 4.226728 -0.583443 0.075522  
 C 4.463242 -2.005759 -0.108813  
 N 2.860090 1.273358 0.286450  
 N -2.881042 -1.054774 -1.085628  
 C -3.613460 -1.118671 0.069714  
 N -2.876091 -0.907473 1.204023  
 O -4.804634 -1.406479 0.090744  
 H -2.518577 1.863721 -1.052414  
 H 5.522643 -2.193992 0.041783  
 H -2.575726 1.972657 0.701318  
 H -1.940892 3.345372 -0.243806  
 H 3.902497 -2.588240 0.624928  
 H 4.192888 -2.328655 -1.117135  
 H 5.021454 0.030139 0.158412  
 H 2.031664 -1.746416 -0.403260  
 H 0.986052 -0.350547 -0.110080  
 H 3.667440 1.842939 0.479788  
 H 1.931597 1.719758 0.155862  
 H -3.405425 -0.757618 2.047108  
 H -1.983176 -0.434359 1.102490  
 H -1.989514 -0.569449 -1.049801  
 H -3.414911 -1.012728 -1.938251

Urea\_Orientation7

C 4.154297 0.366288 -0.140684  
 C 2.763121 -0.243586 -0.104652  
 O 1.790746 0.542094 -0.324845  
 O 2.642502 -1.461115 0.138830  
 N 0.004218 -1.977164 0.718599  
 C -0.936323 -1.466774 -0.067469  
 N -2.228144 -1.701023 0.165662  
 C -3.306704 -1.096224 -0.606270  
 N -0.559725 -0.726780 -1.117218  
 N -0.309152 2.480492 -0.590402  
 C -1.138843 1.940378 0.351172  
 O -2.359371 2.068400 0.315830  
 N -0.489797 1.303501 1.378053  
 H 4.305539 0.863324 -1.100209  
 H -4.248830 -1.432145 -0.181648  
 H 4.229216 1.129015 0.636992  
 H 4.920523 -0.390775 0.011921  
 H -3.258894 -0.006655 -0.537981  
 H -3.267343 -1.413971 -1.650617  
 H -2.465163 -2.342446 0.906143  
 H -1.268638 -0.226006 -1.630638  
 H 0.360095 -0.268528 -1.020684  
 H -0.256698 -2.509607 1.532710  
 H 1.011112 -1.824698 0.498541  
 H -1.086966 0.732505 1.956791  
 H 0.428438 0.923758 1.168007  
 H 0.631707 2.109931 -0.673894  
 H -0.760218 2.807593 -1.429398

Urea\_Orientation8

C -4.978098 -1.372155 -0.047324  
 C -3.600355 -0.718038 -0.034067  
 O -3.576571 0.538691 0.025179  
 O -2.597563 -1.466502 -0.103066  
 N -1.179151 1.760776 -0.077096  
 C -0.055199 1.055999 -0.031118  
 N 1.136174 1.663602 0.039171  
 C 1.279521 3.108641 0.066617  
 N -0.116841 -0.277304 -0.052426  
 C 3.398156 -1.029195 -0.006124  
 N 2.656183 -1.239261 1.138606  
 N 3.973422 -2.119322 -0.553857  
 O 3.484023 0.090279 -0.508884  
 H -5.620099 -0.905208 0.700044  
 H 2.330863 3.338084 0.223237  
 H -5.435766 -1.205052 -1.025485  
 H -4.906021 -2.443166 0.132209

H 0.958308 3.573360 -0.870395  
H 0.710249 3.536336 0.894325  
H 1.967658 1.108132 -0.167729  
H -1.136978 2.757944 -0.206943  
H -2.113377 1.278969 -0.044749  
H 0.690537 -0.798680 0.266885  
H -1.049412 -0.737722 -0.067858  
H 4.375694 -2.021937 -1.471622  
H 3.816521 -3.048100 -0.198829  
H 2.795144 -2.099454 1.649500  
H 2.584899 -0.424177 1.732886

#### Urea\_Orientation9

C -5.052230 -1.534227 -0.105305  
C -3.705498 -0.820968 -0.026059  
O -2.668913 -1.524167 -0.060651  
O -3.740689 0.434606 0.048491  
N -1.391544 1.761593 -0.132756  
C -0.248424 1.112129 0.068292  
N -0.267820 -0.203165 0.273930  
N 0.919378 1.764309 0.075595  
C 1.030700 3.198776 -0.109068  
N 4.752641 -0.353790 -0.280738  
C 3.638134 -1.061005 0.040382  
N 3.719368 -2.409043 -0.091741  
O 2.605495 -0.506964 0.432738  
H -5.742420 -1.109777 0.624402  
H 2.083638 3.465021 -0.063494  
H -5.479369 -1.367496 -1.097237  
H -4.941411 -2.604645 0.058130  
H 0.641575 3.508784 -1.082628  
H 0.504590 3.744520 0.678638  
H 1.752555 1.197706 0.206689  
H -1.384443 2.760799 -0.249183  
H -2.305068 1.250806 -0.065186  
H 0.623071 -0.678257 0.359389  
H -1.156071 -0.725266 0.153233  
H 4.470989 -2.831535 -0.612632  
H 2.850473 -2.916767 -0.051456  
H 4.770723 0.607634 0.019670  
H 5.643783 -0.816895 -0.362451

#### Urea\_Orientation10

C 1.270500 3.839302 -0.268976  
C 0.345367 2.682870 0.084804  
O 0.872273 1.700315 0.680748  
O -0.858689 2.768307 -0.239317  
N -2.530457 0.585358 -0.118422  
C -1.940990 -0.558393 0.217277  
N -0.732266 -0.529938 0.768270  
N -2.568975 -1.725898 0.030058  
C -3.897927 -1.840678 -0.546875  
H 0.705816 4.704016 -0.612003  
H -4.132389 -2.896792 -0.647807  
H 1.879037 4.104006 0.596379  
H 1.949539 3.514991 -1.061200  
H -4.654728 -1.375190 0.089647  
H -3.927903 -1.387728 -1.539986  
H -2.135015 -2.550528 0.413427  
H -3.461851 0.588555 -0.498536  
H -1.959389 1.452527 -0.132476  
H -0.139093 -1.357282 0.785381  
H -0.220137 0.371203 0.803023  
O 1.602168 -2.140295 0.741015  
C 2.471926 -1.720053 -0.025009  
N 3.469349 -2.543668 -0.476502  
N 2.520096 -0.437049 -0.463235  
H 1.950853 0.269794 -0.000798  
H 3.345968 -0.107496 -0.936751  
H 3.988250 -2.288158 -1.302204  
H 3.287542 -3.528460 -0.364179

#### Urea\_Orientation11

C 3.670083 -1.578182 -0.257240  
C 2.707264 -0.458748 0.114690  
O 1.739447 -0.775237 0.866805  
O 2.914146 0.681469 -0.350163  
N -0.308940 1.008788 0.654447  
C -0.227519 2.158262 0.000706  
N -1.341251 2.812239 -0.342822  
C -2.670246 2.335102 0.009105  
N 0.977528 2.679911 -0.256113  
O -2.234833 -1.052365 0.480929  
C -1.812723 -2.097832 -0.023396  
N -0.495082 -2.359730 -0.200844  
N -2.677843 -3.077879 -0.427454  
H 3.922835 -2.162365 0.627964  
H -3.397656 3.045074 -0.374571  
H 3.168252 -2.247243 -0.961083  
H 4.572101 -1.184219 -0.721362  
H -2.864921 1.354298 -0.430091  
H -2.779906 2.264744 1.093897  
H -1.251983 3.677086 -0.851201  
H -1.171035 0.462526 0.653604  
H 0.555566 0.454939 0.813834  
H 1.039425 3.516047 -0.814596  
H 1.776334 2.023050 -0.255062  
H -2.368324 -3.780911 -1.080203  
H -3.637757 -2.786084 -0.520529  
H 0.208637 -1.774722 0.246650  
H -0.203666 -3.288087 -0.461516

#### Urea\_Orientation12

C 4.999378 -1.217662 0.119743  
C 3.605887 -0.603606 0.034171  
O 3.543831 0.651977 0.084150  
O 2.628142 -1.381418 -0.068331  
N 1.097172 1.786145 0.110913  
C 0.010407 1.050893 -0.099990  
N -1.201259 1.319344 -0.110515  
C -1.416159 3.041454 0.088465  
N 0.141519 -0.255501 -0.315488  
N -3.793609 -0.081658 -0.352820  
C -3.333131 -1.281824 0.161692  
N -2.515040 -1.987346 -0.696128  
O -3.527685 -1.617800 1.311055  
H 5.652121 -0.749145 -0.618224  
H -2.482163 3.234986 -0.004762  
H 5.419394 -1.009350 1.106150  
H 4.966996 -2.293486 -0.040078  
H -1.094050 3.362727 1.082493  
H -0.892462 3.628971 -0.669438  
H -2.017466 1.026690 -0.222059  
H 1.005072 2.765214 0.323361  
H 2.049346 1.342766 0.100292  
H -0.677224 -0.827572 -0.483928  
H 1.080091 -0.697897 -0.229652  
H -2.326115 -2.933092 -0.395786  
H -2.653680 -1.888421 -1.692207  
H -4.528804 0.334464 0.201860  
H -3.955122 -0.021357 -1.349240

#### Guanidinium chloride

##### GdmCl\_Orientation1

C 2.866476 -3.151548 -0.094082  
C 1.691474 -2.189695 -0.099108  
O 1.443461 -1.550095 -1.143260  
O 1.011848 -2.105226 0.970551  
N -1.015226 -0.367122 -1.142308  
C -1.980277 -0.918128 -0.419012  
N -3.229756 -0.450750 -0.482396  
C -3.607215 0.697313 -1.291191  
N -1.694450 -1.973007 0.350721  
C -0.153302 1.421198 1.283358  
N -1.178118 0.880016 1.949677

N 0.966677 0.729421 1.120584  
N -0.256321 2.651167 0.788836  
Cl 2.548954 2.834008 -0.860776  
H 3.535117 -2.956320 -0.929959  
H -4.679787 0.840497 -1.195772  
H 3.402813 -3.080912 0.851937  
H 2.477653 -4.169408 -0.180048  
H -3.100459 1.605054 -0.925239  
H -3.376578 0.518450 -2.342952  
H -3.902633 -0.818616 0.171670  
H -1.200392 0.459391 -1.686954  
H -0.055741 -0.781274 -1.146195  
H -2.416910 -2.362153 0.935306  
H -0.708881 -2.134904 0.610224  
H -1.047245 3.235723 1.004434  
H 0.509798 3.020743 0.229779  
H 1.674030 1.139844 0.514467  
H 0.950739 -0.293409 1.214747  
H -1.061818 0.001348 2.429088  
H -2.026972 1.397465 2.111750

##### GdmCl\_Orientation2

C -4.560132 0.233148 -0.610341  
C -3.062870 0.120304 -0.395935  
O -2.667569 -0.634900 0.537035  
O -2.292962 0.780784 -1.137164  
N -0.200264 -1.843678 -0.026311  
C 0.671654 -1.245164 -0.834457  
N 1.976783 -1.495739 -0.729558  
C 2.542864 -2.311026 0.333991  
N 0.228269 -0.438975 -1.808201  
C 0.270872 0.830306 1.640115  
N 1.549367 0.806988 2.018824  
N -0.062492 1.485656 0.533737  
N -0.674011 0.248949 2.384167  
Cl 2.812544 1.691866 -1.030294  
H -4.981797 -0.764845 -0.737525  
H 3.618414 -2.355247 0.186909  
H -5.012748 0.667077 0.283371  
H -4.789194 0.850819 -1.475721  
H 2.339596 -1.884178 1.320382  
H 2.150445 -3.328039 0.284769  
H 2.589134 -0.838390 -1.198929  
H 0.143147 -2.406303 0.736271  
H -1.160311 -1.476560 0.065599  
H 0.911810 0.186161 -2.218034  
H -0.718917 -0.060087 -1.707883  
H -0.385813 -0.359306 3.135219  
H -1.550397 0.013336 1.910686  
H -0.964286 1.315679 0.078561  
H 0.700540 1.793985 -0.066084  
H 2.253705 1.222168 1.419411  
H 1.829773 0.387132 2.890186

##### GdmCl\_Orientation3

C -4.506129 -0.844764 0.338823  
C -3.176182 -0.111655 0.325459  
O -3.166858 1.128306 0.451929  
O -2.132062 -0.822369 0.175525  
N -0.647851 2.074660 -0.184116  
C 0.349532 1.444678 0.423780  
N 1.621300 1.694898 0.120992  
C 2.021773 2.658325 -0.890662  
N 0.058687 0.575850 1.410456  
C 0.688814 -1.392727 -1.243131  
N 0.370570 -2.119918 -0.171350  
N -0.288015 -0.826097 -1.946346  
N 1.961208 -1.314061 -1.638402  
Cl 3.072538 -1.013699 1.461465  
H -5.326644 -0.168371 0.568139  
H 3.104498 2.745948 -0.866178  
H -4.667576 -1.298362 -0.641445  
H -4.468157 -1.653356 1.069887

H 1.718646 2.338397 -1.891571  
H 1.590841 3.638181 -0.676315  
H 2.314868 1.064755 0.516391  
H -0.467864 2.624883 -1.008228  
H -1.622863 1.790712 0.039487  
H 0.838228 0.019525 1.748484  
H -0.818966 0.071052 1.266597  
H 2.680353 -1.529231 -0.956510  
H 2.211133 -0.680418 -2.381629  
H -0.066958 -0.205191 -2.708546  
H -1.190792 -0.737253 -1.477170  
H -0.577745 -2.020028 0.182440  
H 1.109071 -2.336323 0.487374

GdmCl\_Orientation4

C -0.080742 3.810913 -0.149510  
C 0.767190 2.554136 -0.100752  
O 0.230078 1.526019 0.429561  
O 1.920582 2.572355 -0.565068  
N 2.880567 -0.007909 -0.580562  
C 2.803230 -0.726758 0.535497  
N 2.054566 -0.269804 1.542715  
N 3.468659 -1.876184 0.652932  
C 4.367614 -2.391702 -0.368845  
H 0.446022 4.621671 -0.647645  
H 4.816852 -3.305529 0.009079  
H -1.013144 3.592526 -0.673713  
H -0.340586 4.105776 0.868798  
H 3.828574 -2.625208 -1.289729  
H 5.164197 -1.675533 -0.579033  
H 3.308431 -2.432599 1.477955  
H 3.460717 -0.324697 -1.340244  
H 2.532881 0.974544 -0.590558  
H 1.920674 -0.843550 2.359783  
H 1.353788 0.448414 1.317342  
C -1.752644 -0.831711 -0.563061  
N -2.199399 0.195301 0.147579  
N -2.595868 -1.783908 -0.959881  
N -0.454615 -0.898739 -0.869254  
H -2.256126 -2.614765 -1.415235  
H -3.564220 -1.740059 -0.651758  
H -3.175100 0.210333 0.427477  
H -1.532364 0.917496 0.423188  
H 0.127542 -0.101573 -0.622801  
H -0.117917 -1.581244 -1.528106  
Cl -5.345339 -0.730210 0.463799

GdmCl\_Orientation5

C 4.204146 -0.607934 0.588372  
C 2.737128 -0.966087 0.436226  
O 2.223614 -1.794374 1.208438  
O 2.102781 -0.377226 -0.501182  
N -0.152373 -1.807790 -1.424213  
C -1.006330 -1.614562 -0.409796  
N -0.536969 -1.624943 0.834916  
N -2.311427 -1.456775 -0.632456  
C -2.864803 -1.232830 -1.959999  
H 4.727488 -0.836663 -0.341606  
H -3.936521 -1.086977 -1.855495  
H 4.292056 0.467612 0.755598  
H 4.659594 -1.149857 1.414224  
H -2.432731 -0.345590 -2.430987  
H -2.701847 -2.103521 -2.597140  
H -2.856055 -1.147861 0.166374  
H -0.494707 -1.701061 -2.366124  
H 0.809190 -1.496320 -1.247405  
H -1.137780 -1.284508 1.575598  
H 0.477675 -1.748233 1.005891  
C 0.423539 2.420666 -0.454308  
N -0.089718 1.322393 0.083941  
N -0.263489 3.563493 -0.443658  
N 1.631777 2.356820 -1.007838  
H 0.114315 4.405635 -0.845278

H -1.179484 3.604752 -0.027451  
H -0.961545 1.319407 0.610249  
H 0.506643 0.496829 0.089020  
H 2.114864 1.456453 -1.000261  
H 2.031269 3.151457 -1.478390  
Cl -2.797075 0.641373 1.872783

GdmCl\_Orientation6

C 3.654128 -1.668566 -0.880559  
C 2.182201 -1.486392 -0.553653  
O 1.881243 -1.346829 0.676222  
O 1.360578 -1.451327 -1.489288  
N -1.250309 -0.946591 -0.779151  
C -1.661002 -1.569832 0.320385  
N -0.798076 -2.342642 0.991197  
N -2.926217 -1.465125 0.724362  
C -3.956368 -0.776494 -0.042462  
H 3.783561 -2.061199 -1.886959  
H -4.916850 -0.986576 0.420341  
H 4.143552 -0.692427 -0.818357  
H 4.124462 -2.324208 -0.148426  
H -3.790447 0.302966 -0.052291  
H -3.970244 -1.150253 -1.067833  
H -3.167137 -1.845685 1.625912  
H -1.760021 -0.136885 -1.114144  
H -0.270677 -1.094716 -1.093805  
H -1.115977 -2.849670 1.801901  
H 0.205126 -2.149033 0.901555  
C 1.446305 1.900097 0.675201  
N 1.187699 3.161031 0.328279  
N 0.444003 1.045572 0.848591  
N 2.692192 1.489031 0.906956  
H 0.706560 0.058152 0.895148  
H -0.465224 1.310499 0.474719  
H 0.253160 3.384024 0.002692  
H 1.937312 3.796980 0.109497  
H 3.480454 2.104342 0.793435  
H 2.841636 0.508352 1.119215  
Cl -1.964144 2.425222 -0.806658

GdmCl\_Orientation7

C -4.615329 0.251168 -0.425062  
C -3.196750 -0.274809 -0.309080  
O -2.936190 -1.425345 -0.705018  
O -2.334529 0.514412 0.198818  
N -0.293178 -0.877990 1.524560  
C 0.421301 -1.480843 0.569527  
N -0.190728 -1.841792 -0.552689  
N 1.720588 -1.743722 0.748628  
C 2.487504 -1.143618 1.832444  
H -4.965049 0.563586 0.560129  
H 3.519727 -1.467348 1.728221  
H -4.615118 1.135046 -1.065803  
H -5.282304 -0.503101 -0.836405  
H 2.455340 -0.050391 1.794065  
H 2.120157 -1.493784 2.797931  
H 2.240355 -1.920536 -0.103258  
H 0.181375 -0.491231 3.224771  
H -1.167159 -0.426312 1.223964  
H 0.334941 -2.297938 -1.281377  
H -1.217679 -1.723804 -0.649740  
C 0.523660 1.965348 0.130660  
N 0.164119 1.236241 -0.923042  
N 1.810433 2.244934 0.332177  
N -0.421830 2.445390 0.938423  
H 2.105164 2.815705 1.107810  
H 2.508940 1.785405 -0.244683  
H 0.895622 0.743130 -1.430127  
H -0.774832 0.841002 -0.890154  
H -1.363789 2.074497 0.834769  
H -0.170372 2.914686 1.793131  
Cl 3.065430 -0.079768 -1.698881

GdmCl\_Orientation8

C 4.898944 0.162559 -0.094930  
C 3.458932 -0.320650 0.023997  
O 2.953146 -0.353314 1.172715  
O 2.869281 -0.622096 -1.044617  
N 0.330817 -1.481863 -0.862029  
C -0.305026 -1.434119 0.300996  
N 0.325058 -0.953033 1.367697  
N -1.579223 -1.845904 0.397671  
C -2.322483 -2.413110 -0.713798  
C -2.769633 0.918716 0.070452  
N -2.193979 1.001956 -1.126860  
N -3.994825 0.407512 0.194474  
N -2.092940 1.310352 1.142544  
Cl 0.484502 2.628319 -0.331215  
H 5.411400 -0.359068 -0.902586  
H -3.344377 -2.582214 -0.384318  
H 4.884840 1.228309 -0.338127  
H 5.431770 0.029747 0.845103  
H -2.344542 -1.712997 -1.552104  
H -1.897126 -3.364159 -1.044721  
H -1.983753 -1.899205 1.319090  
H -0.113869 -1.907360 -1.658161  
H 1.323231 -1.136275 -0.937311  
H -0.165333 -0.881900 2.244117  
H 1.341933 -0.703735 1.307978  
H -2.734629 0.854883 -1.964303  
H -1.293194 1.475205 -1.196641  
H -1.168817 1.720968 1.018992  
H -2.490869 1.237709 2.064786  
H -4.459814 0.395194 1.087935  
H -4.541557 0.173234 -0.618652

GdmCl\_Orientation9

C -4.442147 0.787101 -0.801079  
C -2.989429 0.539413 -0.443183  
O -2.118133 0.713277 -1.332676  
O -2.730005 0.132866 0.723782  
N 0.445020 1.711293 -0.537111  
C 0.774538 1.405221 0.720458  
N 2.009039 1.644569 1.158630  
C 3.034691 2.296739 0.355972  
N -0.144481 0.901317 1.541335  
N -1.191766 -2.202198 1.156928  
C -0.106895 -2.039590 0.396078  
N 1.047190 -2.626001 0.718749  
N -0.184362 -1.352904 -0.738192  
H -4.865077 -0.149283 -1.174375  
H 3.876109 2.521377 1.006004  
H -5.006871 1.088525 0.079390  
H -4.522679 1.535529 -1.587398  
H 3.372342 1.642867 -0.451373  
H 2.651217 3.233441 -0.052647  
H 2.250791 1.322593 2.082508  
H 1.185488 1.766388 -1.221199  
H -0.485679 1.440703 -0.874087  
H 0.048640 0.839288 2.528386  
H -1.092506 0.661742 1.213677  
H 0.692967 -1.135468 -1.208432  
H -0.991931 -0.762124 -0.946896  
H -1.950160 -1.527907 1.035110  
H -1.090862 -2.630886 2.063600  
H 1.160169 -3.076115 1.612247  
H 1.876066 -2.387453 0.181987  
Cl 2.952239 -0.918718 -1.405129

GdmCl\_Orientation10

C 4.391903 0.356331 -1.022813  
C 2.986371 0.241300 -0.464553  
O 2.046550 0.742991 -1.135771  
O 2.825287 -0.372460 0.625469  
N -0.396326 -0.747575 -0.890149





H 1.067205 -0.896854 -0.922474  
H 3.266294 -2.525760 0.418148  
H 2.787554 -2.595164 -1.293173  
H 0.245201 -3.114235 -0.331791  
H 1.031463 -3.026882 1.261145  
H -1.117401 -1.403635 0.369497  
H 0.895845 -0.284929 1.410997  
H 3.752631 -0.289632 -0.011304

#### Glycerol\_Orientation4

C -4.123718 -0.398423 -0.446593  
C -2.891521 0.443136 -0.158909  
O -1.897380 -0.169276 0.343494  
O -2.913491 1.661059 -0.410712  
O -1.134123 -2.652478 0.894504  
C -0.203155 -2.954871 -0.126785  
C 0.862653 -1.866427 -0.207276  
C 2.086035 -2.278378 -1.000125  
O 3.101448 -1.290030 -0.906209  
O 1.317054 -2.146778 1.107856  
N -0.497982 3.051463 -0.256318  
C 0.581617 2.369532 0.132624  
N 1.804222 2.879880 -0.037806  
C 3.015952 2.146335 0.295085  
N 0.422296 1.198471 0.736957  
H -4.523510 -0.774149 0.497697  
H 3.869771 2.752565 0.005972  
H -4.886385 0.183121 -0.959721  
H -3.842187 -1.263978 -1.048840  
H 3.074360 1.953576 1.368729  
H 3.055246 1.200479 -0.251431  
H 1.885891 3.786343 -0.469984  
H 1.212710 0.603747 0.950425  
H -0.500760 0.722491 0.663239  
H -0.376085 3.867721 -0.833908  
H -1.415719 2.571328 -0.271526  
H 0.420963 -0.967967 -0.656061  
H 2.455141 -3.240904 -0.625021  
H 1.836628 -2.386647 -2.056722  
H -0.686202 -3.067050 -1.104420  
H 0.262422 -3.907722 0.140964  
H -1.561871 -1.796595 0.665597  
H 0.568189 -1.731089 1.692574  
H 3.296428 -1.199371 0.033016

#### Glycerol\_Orientation5

C -3.363575 1.907487 0.376882  
C -1.854975 1.768171 0.277922  
O -1.383518 1.523379 -0.875863  
O -1.172222 1.858824 1.317710  
O -2.314582 -0.933830 -1.663509  
C -1.055095 -1.552388 -1.454721  
C -0.734336 -1.587988 0.032573  
C 0.565455 -2.306809 0.327526  
O 0.965885 -2.164111 1.679314  
O -1.792234 -2.232925 0.726991  
N 1.396067 0.899857 1.362916  
C 2.010198 0.870854 0.162660  
N 3.317593 0.625652 0.092332  
C 4.050730 0.536919 -1.161725  
N 1.290328 1.043000 -0.934250  
H -3.806188 0.919123 0.224323  
H 5.099015 0.375789 -0.928276  
H -3.660545 2.286212 1.352248  
H -3.731930 2.559220 -0.415432  
H 3.696384 -0.299933 -1.768138  
H 3.960901 1.466737 -1.726624  
H 3.807819 0.435501 0.952693  
H 1.725595 0.953118 -1.838804  
H 0.267287 1.271402 -0.889273  
H 1.977987 1.083917 2.168318  
H 0.436432 1.307394 1.382275  
H -0.642242 -0.554595 0.394514

H 0.435345 -3.376290 0.145083  
H 1.342416 -1.934170 -0.355117  
H -0.259994 -1.034678 -2.002576  
H -1.131238 -2.576010 -1.832616  
H -2.163383 0.017842 -1.511907  
H -2.600532 -1.890179 0.326501  
H 1.081895 -1.218144 1.831972

#### Glycerol\_Orientation6

C -3.792866 -1.555598 0.185559  
C -2.296030 -1.318584 0.132930  
O -1.718957 -1.446106 -0.979432  
O -1.721183 -0.943332 1.189071  
N 1.002514 -2.054198 -1.062890  
C 1.678785 -1.440355 -0.087025  
N 1.057015 -1.129681 1.045477  
N 2.985813 -1.202606 -0.223140  
H 3.438497 -1.549740 -1.054403  
O -0.115754 0.884054 -1.103986  
O -0.183458 1.754295 0.013106  
C 1.016665 2.673236 -0.115088  
O 2.208710 1.908988 -0.205637  
C -1.499532 2.507645 0.071653  
O -2.598130 1.624628 0.228325  
H -4.102158 -2.263898 -0.580828  
H -4.097342 -1.895790 1.173767  
H -4.278500 -0.596179 -0.014226  
C 3.818340 -0.668450 0.846953  
H 1.451705 -2.146078 -1.961024  
H -0.021379 -1.936710 -1.066054  
H 1.552497 -0.585633 1.734201  
H 0.019613 -1.111398 1.086239  
H -0.078816 1.176725 0.941199  
H 0.895723 3.306213 -1.004118  
H 1.104557 3.315881 0.761870  
H -1.460770 3.237604 0.890854  
H -1.657149 3.045984 -0.866268  
H -2.358862 0.966072 0.896652  
H -0.767412 0.166004 -1.014717  
H 2.029751 1.227350 -0.865810  
H 4.836566 -0.599340 0.474407  
H 3.480301 0.333477 1.116331  
H 3.806860 -1.324126 1.720552

#### Glycerol\_Orientation7

C 3.511689 1.948528 -0.120488  
C 2.042197 1.573234 -0.108239  
O 1.467226 1.478330 1.006451  
O 1.497639 1.318772 -1.217571  
N -1.258241 1.067299 -1.301424  
C -1.950264 1.060685 -0.165857  
N -3.271036 0.860701 -0.182580  
C -4.076129 0.763562 1.024478  
N -1.319226 1.292538 0.982512  
O 0.872133 -1.399757 -1.293188  
C 0.519027 -1.649882 0.061012  
C 1.707400 -2.139370 0.869527  
O 2.708697 -1.141180 0.980231  
C -0.634075 -2.633630 0.024351  
O -1.718448 -2.076049 -0.699772  
H -3.675265 0.537258 -1.047451  
H 3.771273 2.466532 -1.042060  
H 3.766255 2.551775 0.749175  
H 4.081587 1.016222 -0.075791  
H -1.738995 1.002775 -2.184098  
H -0.231562 1.195680 -1.276610  
H -1.796297 1.138221 1.855736  
H -0.288884 1.400409 0.995903  
H 0.154114 -0.722518 0.518513  
H -0.296332 -3.571035 -0.438131  
H -0.987941 -2.851151 1.033628  
H 1.365931 -2.466370 1.860437  
H 2.166317 -2.992247 0.363526

H 2.287369 -0.335238 1.313307  
H 1.227665 -0.497271 -1.343992  
H -1.312186 -1.628932 -1.453457  
H -5.118303 0.681426 0.728673  
H -3.807772 -0.114549 1.617882  
H -3.964509 1.665564 1.628345

#### Glycerol\_Orientation8

C -3.347852 -2.283545 0.388358  
C -1.881441 -1.909185 0.253043  
O -1.158052 -1.986719 1.268812  
O -1.491044 -1.511570 -0.886638  
O -0.347071 0.942080 -0.958247  
C -0.787192 1.426573 0.307255  
C 0.219625 2.485116 0.728771  
O 1.544297 1.978419 0.639084  
C -2.195009 1.990275 0.159136  
H -2.507477 2.502176 1.072391  
N 1.274693 -1.840308 -1.262586  
C 1.903568 -1.116869 -0.332941  
N 3.072452 -0.528553 -0.603920  
C 3.981594 -0.041290 0.430035  
N 1.391485 -1.036626 0.892802  
H -2.888347 1.160056 -0.027759  
H 3.414908 -0.584806 -1.550669  
H -3.736497 -2.661415 -0.555908  
H -3.486392 -3.014715 1.183024  
H -3.908080 -1.381995 0.651116  
H 1.688138 -1.923133 -2.178256  
H 0.250358 -1.904157 -1.188776  
H 1.650382 -0.221423 1.434609  
H 0.438634 -1.427696 1.052508  
H -0.797364 0.609089 1.038096  
H 0.101537 3.367742 0.090459  
H 0.049448 2.777070 1.765925  
O -2.245022 2.931504 -0.898669  
H -0.737843 0.049946 -1.064076  
H 1.607447 1.597269 -0.247194  
H 4.950431 0.131442 -0.030817  
H 3.621739 0.893536 0.861371  
H 4.090740 -0.789423 1.217175  
H -1.756780 2.522668 -1.623960

#### Glycerol\_Orientation9

C -3.163149 -1.784688 0.351738  
C -1.648955 -1.872032 0.242525  
O -1.135180 -1.787807 -0.911466  
O -0.999762 -1.975999 1.307795  
H -2.730658 0.641971 -1.090001  
C -2.317671 1.540597 -0.615878  
C -0.865831 1.268197 -0.263203  
C -0.113225 2.516681 0.158234  
O 1.256870 2.210122 0.182821  
O -0.173765 0.747808 -1.386519  
N 1.659979 -1.866568 -0.979371  
C 2.091086 -0.945735 -0.114339  
N 1.449490 -0.785713 1.039990  
N 3.192477 -0.229471 -0.365139  
C 3.924089 0.490149 0.674888  
H 3.652434 -0.380029 -1.249741  
H -3.641588 -1.993705 -0.603455  
H -3.526851 -2.466038 1.120391  
H -3.415399 -0.765027 0.661119  
H 2.163356 -1.997074 -1.843022  
H 0.646439 -2.059951 -0.974862  
H 1.545820 0.114500 1.492111  
H 0.551644 -1.297260 1.176677  
H -0.843390 0.548655 0.565151  
H -0.213296 3.279197 -0.625253  
H -0.521607 2.913052 1.087367  
O -2.996685 1.846606 0.592434  
H -2.376080 2.369515 -1.331845  
H -0.450037 -0.182751 -1.457349



H 1.542882 1.744173 -0.418126  
H 4.875077 0.806574 0.255327  
H 3.374202 1.374350 0.999939  
H 4.108018 -0.161488 1.531083  
H -3.904477 2.078747 0.380138

#### Glycerol\_Orientation10

C 2.789657 -2.870436 -0.464960  
C 1.427317 -2.240106 -0.232317  
O 1.200192 -1.779003 0.925775  
O 0.626174 -2.189882 -1.191442  
N -1.686452 -0.824794 -0.827610  
C -2.180252 -0.722492 0.414203  
N -1.490668 -1.229614 1.433119  
N -3.348772 -0.118530 0.618710  
C -4.114613 1.633095 -0.434321  
O -1.064159 2.127663 -0.744679  
C 0.315883 2.450889 -0.717426  
C 1.172052 1.280331 -0.266398  
C 2.653806 1.639341 -0.234305  
H 3.231847 0.730452 -0.022710  
O 0.764806 0.915780 1.044610  
H -3.701480 -0.082026 1.562408  
H 3.085167 -3.457225 0.404193  
H 2.785920 -3.487171 -1.361483  
H 3.523023 -2.069708 -0.590788  
H -1.726017 -0.933852 2.368215  
H -0.515467 -1.528949 -1.264158  
H -2.337091 -0.782844 -1.599037  
H -0.809297 -1.383711 -0.968436  
H 1.019572 0.438147 -0.957169  
H 0.443415 3.278774 -0.017049  
H 0.662178 2.779019 -1.705582  
H 2.985777 2.043745 -1.193026  
O 2.893677 2.626173 0.754663  
H 0.982404 -0.028130 1.149530  
H -1.138719 1.219014 -1.059975  
H -4.964076 1.027270 0.028670  
H -3.505980 1.285201 -0.940087  
H -4.492343 -0.191109 -1.159345  
H 2.403798 2.324085 1.529715

#### Glycerol\_Orientation11

C 2.509608 2.421721 -0.362885  
C 1.042440 2.044294 -0.427562  
O 0.659559 1.364612 -1.427000  
O 0.308978 2.370253 0.532231  
C 2.289423 -0.788910 -0.924005  
C 1.490420 -1.255991 0.145696  
C 0.744340 -2.524038 -0.255707  
O -0.026465 -2.341602 -1.428065  
C 2.376911 -1.501408 1.347963  
O 2.807120 -0.243309 1.844727  
C -2.460843 0.268044 -0.131223  
N -3.664893 -0.293786 -0.022792  
C -4.488977 -0.198324 1.172344  
N -1.916704 0.923127 0.878986  
N -1.766482 0.139686 -1.279902  
H 1.817378 -2.051266 2.114224  
H -3.968395 -0.897888 -0.770591  
H 2.927145 2.528254 -1.363154  
H 2.647049 3.335159 0.213418  
H 3.019231 1.599085 0.147193  
H -2.300836 -0.019399 -2.122592  
H -0.881317 0.689770 -1.376012  
H -2.368541 0.923364 1.779441  
H -1.048474 1.501936 0.734711  
H 0.754110 -0.486899 0.425569  
H 1.470421 -3.310545 -0.480527  
H 0.120626 -2.862536 0.581994  
H 3.230771 -2.112577 1.031011  
H 1.783939 -0.085762 -1.363899  
H -0.645567 -1.616666 -1.270781

H -5.454258 -0.645985 0.953789  
H -4.038212 -0.731305 2.012811  
H -4.646395 0.847547 1.441890  
H 3.425564 -0.401617 2.562590

#### Glycerol\_Orientation12

C 3.539253 -1.738933 -0.458958  
C 2.044855 -1.526852 -0.310891  
O 1.624966 -1.197545 0.846028  
O 1.320449 -1.650574 -1.317834  
O 0.071346 1.002335 1.100438  
C 0.515843 1.670549 -0.075185  
C 1.850399 2.349224 0.177629  
H 2.128499 2.965401 -0.681198  
C -0.581954 2.656779 -0.441059  
O -1.840719 1.999497 -0.464882  
N -1.120375 -1.977296 1.105509  
C -1.824073 -1.246248 0.234551  
N -1.310221 -0.982751 -0.962919  
N -3.058888 -0.835795 0.534970  
C -4.005716 -0.354822 -0.467881  
O 2.894960 1.408322 0.367442  
H -3.405690 -1.033669 1.460946  
H 3.943520 -2.230947 0.424905  
H 3.766023 -2.310535 -1.356611  
H 4.000357 -0.750888 -0.538028  
H -1.529743 -2.202484 1.998659  
H -0.098458 -1.916256 1.054933  
H -1.666029 -1.064681 -1.440650  
H -0.317143 -1.248217 -1.134179  
H 0.641299 0.939599 -0.885028  
H -0.595847 3.477526 0.287677  
H -0.409830 3.075691 -1.432892  
H 1.748321 3.000646 1.055191  
H 0.516923 0.133924 1.115324  
H -1.884722 1.520250 0.374073  
H -4.990754 -0.324743 -0.010399  
H -3.743658 0.647984 -0.808286  
H -4.028687 -1.035109 -1.320998  
H 2.552365 0.672952 0.894870

#### Two guanidinium ions

##### 2Gdm<sup>+</sup>\_Orientation1

C -2.152655 -1.101450 2.395184  
C -0.896339 -0.858136 1.590761  
O 0.222664 -1.027402 2.113069  
O -1.045627 -0.482016 0.377397  
N 1.201360 1.199163 -0.306584  
C 2.161872 1.551958 0.543856  
N 2.116766 1.119491 1.803279  
N 3.149662 2.348590 0.141171  
C 3.246096 2.897628 -1.203846  
N 0.705355 -1.897143 -1.422352  
C 1.946654 -2.107066 -0.995097  
N 2.242832 -1.908632 0.283979  
N 2.885174 -2.517240 -1.847921  
H -2.789814 -0.215691 2.355617  
H 4.107624 3.558171 -1.233357  
H -2.707958 -1.926138 1.943253  
H -1.911771 -1.343350 3.427311  
H 3.388059 2.107985 -1.944996  
H 2.355858 3.479862 -1.448850  
H 3.889361 2.550429 0.795151  
H 1.246230 1.475542 -1.273576  
H 0.413215 0.617373 -0.012392  
H 2.838926 1.377711 2.455817  
H 1.438589 0.408100 2.073242  
H 0.476608 -2.020988 -2.395328  
H 0.013614 -1.462713 -0.809183  
H 1.517232 -1.647190 0.957942  
H 3.178719 -2.068282 0.620966  
H 3.814157 -2.741704 -1.531706

H 2.675778 -2.650912 -2.823757  
C -3.925999 0.663570 -0.779767  
N -3.608489 -0.622940 -0.874459  
N -3.079776 1.486429 -0.167413  
N -5.072546 1.121930 -1.275693  
H -2.705247 -0.917769 -0.508285  
H -4.193458 -1.270515 -1.376176  
H -5.735773 0.502221 -1.711494  
H -5.311901 2.097984 -1.211558  
H -3.282549 2.467328 -0.068980  
H -2.191930 1.111342 0.152031

##### 2Gdm<sup>+</sup>\_Orientation2

C 2.118779 -0.292536 2.520412  
C 0.901692 -0.270139 1.623706  
O -0.213216 -0.589939 2.083141  
O 1.072688 0.093085 0.410460  
N -2.410292 0.771028 0.863301  
C -2.218804 1.634423 -0.129154  
N -3.257138 2.250391 -0.651253  
C -4.635236 2.052655 -0.266572  
N -0.978502 1.890828 -0.546676  
N -1.785865 -2.506507 0.657851  
C -1.739083 -2.287362 -0.651254  
N -2.563327 -2.940247 -1.469497  
N -0.864902 -1.415781 -1.145287  
H 1.891598 -0.775411 3.467354  
H -5.269420 2.685427 -0.880549  
H 2.940885 -0.806570 2.019490  
H 2.436794 0.736259 2.705878  
H -4.942836 1.014302 -0.406766  
H -4.766616 2.340157 0.778593  
H -3.073249 2.890306 -1.447791  
H -3.336334 0.589796 1.214395  
H -1.616956 0.326375 1.335057  
H -0.831398 2.473671 -1.354875  
H -0.198719 1.323318 -0.210923  
H -2.486184 -3.116133 1.047924  
H -1.207179 -1.949883 1.286735  
H -0.188059 -0.934516 -0.549905  
H -0.783552 -1.291282 -2.141745  
H -2.543720 -2.781043 -2.463443  
H -3.233901 -3.601289 -1.112888  
C 4.152961 0.409590 -0.775378  
N 5.393406 0.529837 -1.241703  
N 3.540599 1.440494 -0.202928  
N 3.503286 -0.746680 -0.868464  
H 5.900772 1.394249 -1.145539  
H 5.876820 -0.258084 -1.641404  
H 3.909671 -1.538405 -1.338661  
H 2.544041 -0.784254 -0.534905  
H 2.583590 1.310760 0.116033  
H 3.995467 2.333749 -0.109539

##### 2Gdm<sup>+</sup>\_Orientation3

C 1.149432 4.149129 -0.082848  
C 1.047640 2.638447 -0.089789  
O 0.842450 2.044729 1.002951  
O 1.203579 2.041607 -1.189940  
N 2.546396 -0.414553 -0.754205  
C 2.943719 -0.811811 0.450026  
N 2.717992 -0.034418 1.509066  
N 3.576748 -1.975446 0.596654  
C 3.898944 -2.862611 -0.510656  
N -0.651891 -0.017093 -1.670904  
C -0.902499 -0.774891 -0.612336  
N -0.518892 -0.374270 0.597497  
N -1.581386 -1.917166 -0.747730  
H 2.208784 4.418858 -0.072251  
H 4.428804 -3.721248 -0.108525  
H 0.709614 4.560404 -0.990326  
H 0.673317 4.566626 0.801572  
H 2.992685 -3.216621 -1.006880

H 4.546582 -2.364029 -1.234668  
H 3.839778 -2.255028 1.528643  
H 2.722772 -0.987772 -1.563199  
H 2.102643 0.501962 -0.898584  
H 2.968060 -0.354629 2.430567  
H 2.114856 0.787340 1.420219  
H -1.025130 -0.265772 -2.572692  
H -0.038805 0.801610 -1.584300  
H -0.024998 0.522469 0.731228  
H -0.539330 -1.027427 1.365299  
H -1.801515 -2.481864 0.057241  
H -1.773091 -2.301843 -1.658995  
C -4.000085 -0.325855 0.398303  
N -4.855703 -1.032281 -0.329449  
N -3.586210 -0.789933 1.578764  
N -3.527392 0.828723 -0.057242  
H -5.185031 -1.930836 -0.013583  
H -5.101968 -0.747195 -1.264148  
H -3.076133 -0.186484 2.205472  
H -4.033816 -1.595286 1.988979  
H -3.837748 1.209151 -0.937549  
H -2.899119 1.387541 0.499035

2Gdm+ \_Orientation4

C -1.136497 -2.365479 0.646777  
C -0.522026 -0.981853 0.593329  
O -1.267687 -0.002482 0.319969  
O 0.717291 -0.875177 0.790554  
N -3.571226 -0.573620 -1.283453  
C -4.471913 -0.454602 -0.313655  
N -4.055955 -0.132117 0.906935  
N -5.764566 -0.655621 -0.559821  
N 2.919185 -1.207101 -1.001964  
C 3.393958 -2.300944 -0.412220  
N 4.490482 -2.893584 -0.881349  
N 2.761184 -2.784626 0.649737  
N 1.794432 1.703927 1.199714  
C 1.299430 2.613541 0.360046  
N 1.927122 3.775678 0.175992  
N 1.413439 4.840669 -0.672187  
O 0.161012 2.354196 -0.273445  
H -2.200709 -2.316710 0.874596  
H 2.081294 5.692201 -0.583678  
H -1.013765 -2.828014 -0.336735  
H -0.622743 -2.985980 1.379512  
H 1.379925 4.532956 -1.720143  
H 0.417980 5.146960 -0.345503  
H 2.832512 3.894957 0.603045  
H -0.207100 3.002483 -0.949612  
H -0.371297 1.499584 -0.059068  
H 2.655633 1.882675 1.689384  
H 1.412334 0.753030 1.182458  
H 3.121994 -3.579067 1.151377  
H 1.931279 -2.290095 0.980260  
H 2.064330 -0.795007 -0.643042  
H 3.335027 -0.847507 -1.845074  
H 4.979069 -2.524649 -1.680760  
H 4.853058 -3.729141 -0.452640  
H -6.079627 -0.942275 -1.472527  
H -6.445493 -0.618197 0.181066  
H -4.707402 0.003615 1.662368  
H -3.062358 0.041718 1.043355  
H -2.598459 -0.383063 -1.057495  
H -3.842340 -0.807127 -2.224301

Two molecules of trimethylamine N-oxide

2TMAO \_Orientation1

C -1.931051 -3.090485 -1.579821  
C -1.290894 -1.740829 -1.886962  
O -0.039318 -1.721414 -2.001741  
O -2.047911 -0.742447 -1.986047

C -3.107153 -0.982420 1.406156  
N -2.476448 0.342225 1.660421  
C -2.973524 1.314601 0.648585  
O -1.111938 0.229408 1.557228  
C -2.821391 0.812754 3.028081  
N -0.865426 1.773120 -2.112722  
C 0.322746 1.819437 -1.484187  
N 1.089072 -0.744111 -1.466356  
N 0.735973 2.968233 -0.932393  
C 2.097827 3.171653 -0.456308  
O 3.185154 0.223716 0.191444  
N 2.891982 -0.923525 0.899281  
C 3.998186 -1.168088 1.861152  
C 2.776892 -2.074012 -0.041438  
C 1.605686 -0.751331 1.632546  
H -3.013819 -3.046841 -1.684518  
H -1.519125 -3.856244 -2.237938  
H -1.680821 -3.370832 -0.553074  
H 0.661816 -0.143658 -1.785885  
H 1.922239 -0.653117 -0.840801  
H 2.807054 3.207613 -1.288517  
H 2.388513 2.366095 0.218836  
H 2.129712 4.116602 0.080644  
H 0.156798 3.781798 -1.067776  
H -1.477238 2.569103 -2.019367  
H -1.316754 0.841683 -2.179256  
H 3.705170 -2.118599 -0.606136  
H 1.930973 -1.887317 -0.702794  
H 2.619800 -2.996052 0.519545  
H 0.810377 -0.577950 0.912584  
H 1.394324 -1.642711 2.224315  
H 1.709875 0.120521 2.274269  
H 3.808854 -2.079858 2.427344  
H 4.047618 -0.304536 2.519771  
H 4.915753 -1.249751 1.283601  
H -4.050698 1.453684 0.752733  
H -2.440877 2.248094 0.816708  
H -2.722554 0.902985 -0.326773  
H -4.189419 -0.917479 1.527634  
H -2.847241 -1.261193 0.386863  
H -2.677809 -1.684138 2.117366  
H -3.901877 0.907488 3.142390  
H -2.417889 0.084535 3.727590  
H -2.330663 1.772804 3.169134

2TMAO \_Orientation2

C 2.990330 3.210115 -0.888595  
C 2.024643 2.601430 0.125151  
O 2.519318 2.120243 1.176085  
O 0.807362 2.583079 -0.182992  
C -4.612850 1.318137 -1.026342  
N -3.833479 0.100319 -0.673062  
C -2.570914 0.065198 -1.465216  
O -3.547465 0.133868 0.674842  
C -4.641705 -1.116087 -0.962081  
N -0.997563 1.191950 1.432800  
C -0.419588 -0.019276 1.546772  
N 0.892818 -0.111787 1.762265  
N -1.184123 -1.109223 1.498514  
C -0.683889 -2.442664 1.792162  
O 2.250213 -2.118557 0.452374  
N 2.698468 -1.578014 -0.733127  
C 3.193265 -2.687329 -1.592359  
C 3.807818 -0.622884 -0.455022  
C 1.588890 -0.865669 -1.431170  
H 2.494868 3.972765 -1.487957  
H 3.867595 3.623110 -0.392569  
H 3.324301 2.414091 -1.561155  
H 1.427615 0.766458 1.686591  
H 1.390111 -0.953363 1.406483  
H -0.294528 -2.489772 2.812796  
H 0.112971 -2.726341 1.101405  
H -1.512058 -3.141565 1.700321  
H -2.164953 -0.943506 1.245304

H -1.985751 1.155036 1.173860  
H -0.398851 1.886472 0.962297  
H 4.577060 -1.174391 0.080110  
H 3.409786 0.178428 0.167902  
H 4.198440 -0.225441 -1.392662  
H 1.284262 -0.018136 -0.818470  
H 1.929489 -0.521395 -2.407988  
H 0.770577 -1.575221 -1.534865  
H 3.576356 -2.293514 -2.533557  
H 2.357961 -3.361523 -1.765018  
H 3.975028 -3.198165 -1.036016  
H -4.864517 1.306230 -2.086576  
H -5.508851 1.315724 -0.411286  
H -3.995240 2.179632 -0.783717  
H -2.801542 0.040244 -2.529876  
H -1.997567 0.956271 -1.216697  
H -2.021261 -0.825692 -1.168860  
H -4.899805 -1.151593 -2.020242  
H -4.042046 -1.978745 -0.680330  
H -5.533716 -1.063696 -0.343230

2TMAO \_Orientation3

C -2.680517 4.410723 -0.020539  
C -1.814061 3.153126 -0.020557  
O -2.408283 2.065940 0.221224  
O -0.592429 3.279615 -0.254985  
N -0.765244 -0.117615 -0.134811  
C 0.546724 -0.088552 -0.297177  
N 1.242576 -1.220377 -0.472444  
C 0.589407 -2.509037 -0.607901  
N 1.208110 1.076309 -0.262907  
O -2.516613 -2.208153 -0.040082  
N -3.759335 -1.640515 0.146461  
C -4.763956 -2.734525 0.210561  
C -4.073837 -0.729529 -0.991245  
C -3.776396 -0.862283 1.418373  
O 3.757658 -0.064821 -0.859018  
N 4.666407 -0.234788 0.162918  
C 3.974778 -0.139084 1.479511  
C 5.301633 -1.574435 0.025194  
C 5.704630 0.826442 0.060130  
H -2.093605 5.296220 -0.256960  
H -3.484958 4.295114 -0.749240  
H -3.144828 4.527644 0.960674  
H -1.282934 0.767279 0.014837  
H -1.323463 -0.995704 -0.127493  
H -0.055660 -2.544873 -1.490574  
H -0.029817 -2.727042 0.265077  
H 1.358081 -3.273402 -0.696436  
H 2.235712 -1.090741 -0.692876  
H 2.197039 1.047313 -0.505187  
H 0.652777 1.939018 -0.262509  
H -3.972293 -1.311492 -1.903988  
H -3.356547 0.089534 -0.968546  
H -5.087898 -0.342741 -0.886284  
H -3.080964 -0.031469 1.309552  
H -4.782312 -0.486923 1.608394  
H -3.457412 -1.537034 2.208840  
H -5.762669 -2.322547 0.353636  
H -4.842669 -3.377262 1.041475  
H -4.698906 -3.284529 -0.724717  
H 6.446078 0.703688 0.849312  
H 6.160851 0.733872 -0.922191  
H 5.198144 1.784378 0.148270  
H 4.691530 -0.285777 2.286924  
H 3.519051 0.846322 1.540776  
H 3.203412 -0.906297 1.501080  
H 6.047715 -1.717894 0.806134  
H 4.512161 -2.318771 0.104055  
H 5.755301 -1.614706 -0.961767

2TMAO \_Orientation4

C -4.014516 -1.382131 -1.757382

C -2.744247 -1.795951 -1.032159  
O -2.850885 -2.103512 0.185493  
O -1.664708 -1.738483 -1.671089  
N -0.675725 -1.415999 1.676153  
C 0.522170 -1.294695 1.107140  
N 0.673310 -1.576647 -0.186944  
N 1.583984 -0.893340 1.811638  
C 1.524840 -0.569500 3.223733  
C -3.018448 1.135690 1.205649  
N -2.409380 1.955897 0.121558  
C -2.245242 3.356483 0.597019  
O -3.222158 1.950137 -0.982251  
C -1.078618 1.395819 -0.242005  
H -3.929067 -1.555832 -2.829433  
H -4.884456 -1.897419 -1.351927  
H -4.124604 -0.305657 -1.583017  
H -1.492959 -1.748490 1.120104  
H -0.789307 -1.221125 2.656946  
H 1.237270 -1.438090 3.822275  
H 0.823203 0.247015 3.417503  
H 2.514561 -0.249493 3.539964  
H 2.451699 -0.790709 1.270495  
H 1.602344 -1.411980 -0.576137  
H -0.164507 -1.736248 -0.771703  
H -0.667173 2.039923 -1.016925  
H -1.245419 0.396950 -0.641566  
H -0.421829 1.366355 0.630770  
H -3.117607 0.117776 0.832721  
H -2.389097 1.158273 2.096994  
H -3.997669 1.562695 1.410539  
H -1.599077 3.392644 1.474901  
H -3.238585 3.732603 0.829403  
H -1.817925 3.925543 -0.224901  
O 3.406119 -0.834541 -0.279159  
N 3.770512 0.366861 -0.846971  
C 5.063563 0.806501 -0.254041  
C 3.928536 0.172717 -2.315095  
C 2.718359 1.389459 -0.586263  
H 4.242724 1.105628 -2.782854  
H 4.673330 -0.606392 -2.457583  
H 2.966728 -0.153034 -2.705264

H 5.381747 1.746270 -0.705032  
H 4.907314 0.923076 0.816152  
H 5.787177 0.017109 -0.441929  
H 2.991973 2.334899 -1.053927  
H 1.786223 1.008993 -1.000297  
H 2.628758 1.506146 0.492167

2TMAO\_Orientation5

C -3.268680 0.169628 2.501968  
C -2.102077 -0.649403 1.977630  
O -2.352512 -1.786097 1.503770  
O -0.963594 -0.108598 1.991143  
N 0.908404 -1.304989 0.351817  
C 0.638726 -2.404633 -0.331859  
N 1.540152 -2.922724 -1.182081  
C 2.713857 -2.186498 -1.630851  
N -0.537922 -3.014306 -0.163654  
C -1.482553 2.064254 -0.514168  
N -2.394526 1.244676 -1.359931  
C -1.812234 -0.113144 -1.543959  
C -2.568470 1.899676 -2.684306  
O -3.617019 1.135510 -0.750031  
H -4.083479 -0.473610 2.831862  
H -2.951671 0.832551 3.306428  
H -3.611687 0.771868 1.653348  
H 0.189555 -0.943411 1.007046  
H 1.860732 -0.877768 0.411263  
H 3.282602 -1.806671 -0.782511  
H 2.433554 -1.340805 -2.265831  
H 3.340128 -2.868171 -2.201286  
H 1.240620 -3.704659 -1.743588  
H -0.798547 -3.782755 -0.759155  
H -1.229805 -2.609979 0.497169  
H -2.495302 -0.671141 -2.180710  
H -1.766176 -0.573386 -0.560351  
H -0.820398 -0.051047 -1.997143  
H -1.337239 1.524915 0.421370  
H -0.531961 2.223274 -1.026309  
H -1.984734 3.012748 -0.338330

H -1.611618 1.989954 -3.200118  
H -3.005322 2.878669 -2.502075  
H -3.261955 1.286565 -3.254629  
O 3.236218 0.040830 0.718090  
N 2.946310 1.370635 0.499432  
C 4.188734 2.161678 0.708586  
C 2.464165 1.551730 -0.897752  
C 1.896514 1.817417 1.460331  
H 2.240226 2.601792 -1.086451  
H 3.250722 1.197798 -1.560265  
H 1.574437 0.935503 -1.014871  
H 3.992785 3.221529 0.547454  
H 4.518203 1.975309 1.727586  
H 4.928359 1.789790 0.004057  
H 1.671815 2.872587 1.302147  
H 1.007257 1.206798 1.406348  
H 2.289347 1.651308 2.460678

Salt-bridge

C 3.924674 -0.241763 0.042018  
C 2.407409 -0.100140 0.008700  
O 1.945283 1.051416 0.207187  
O 1.727104 -1.133376 -0.207096  
N -0.941428 -0.896455 0.048803  
C -1.496920 0.305084 -0.042477  
N -2.829415 0.439721 -0.021843  
C -3.745272 -0.682352 0.098169  
N -0.712815 1.372337 -0.174537  
H 4.233503 -1.256945 -0.199199  
H -4.759927 -0.296744 0.051679  
H 4.369361 0.461436 -0.664105  
H 4.285039 0.024413 1.037698  
H -3.608144 -1.388325 -0.723851  
H -3.614574 -1.201836 1.050566  
H -3.209223 1.372278 -0.037907  
H -1.522027 -1.712495 0.145178  
H 0.100408 -1.001247 -0.047204  
H -1.128497 2.289367 -0.185581  
H 0.321236 1.271585 -0.033425

XYZ Coordinates of the optimized geometries obtained at the CPCM(water)/M06-2X/6-311++G\*\* level of theory

Guanidinium ion

|                   |   |           |           |           |                   |           |           |           |
|-------------------|---|-----------|-----------|-----------|-------------------|-----------|-----------|-----------|
|                   | C | -3.392676 | -0.212870 | -0.093175 | N                 | 1.433067  | 0.323214  | 1.483394  |
|                   | O | -2.945387 | -0.234910 | 1.082269  | N                 | 3.272495  | -0.728812 | 0.542630  |
| Gdm+_Orientation1 | O | -2.753037 | 0.208874  | -1.093581 | C                 | 4.199548  | -0.999147 | -0.546546 |
|                   | N | -0.376907 | 1.402625  | -0.614149 | H                 | -2.231645 | 3.872588  | -0.807269 |
|                   | C | 0.298686  | 1.042734  | 0.467413  | H                 | 5.012756  | -1.601893 | -0.152341 |
|                   | N | -0.266169 | 0.185727  | 1.330933  | H                 | -3.185440 | 2.431209  | -0.354105 |
|                   | N | 1.544384  | 1.480837  | 0.676203  | H                 | -2.442689 | 3.418597  | 0.900585  |
|                   | C | 2.247543  | 2.368847  | -0.237169 | H                 | 3.712730  | -1.556062 | -1.350027 |
|                   | C | 2.472413  | -1.370579 | -0.266775 | H                 | 4.616222  | -0.069621 | -0.939076 |
|                   | N | 1.482699  | -1.269418 | -1.149221 | H                 | 3.440567  | -1.163867 | 1.436552  |
|                   | N | 3.704489  | -0.998439 | -0.601251 | H                 | 2.438482  | 0.391223  | -1.565881 |
|                   | N | 2.222031  | -1.831394 | 0.954911  | H                 | 1.146426  | 1.317688  | -0.807564 |
|                   | H | -5.291497 | -0.202165 | -1.122256 | H                 | 1.630679  | -0.123014 | 2.365422  |
|                   | H | 3.239755  | 2.548511  | 0.167695  | H                 | 0.482942  | 0.669705  | 1.308753  |
|                   | H | -4.694945 | -1.799168 | -0.669188 | C                 | -2.102618 | -1.923850 | -0.125350 |
|                   | H | -5.378482 | -0.747938 | 0.580134  | N                 | -2.537219 | -3.159559 | -0.374100 |
|                   | H | 2.356554  | 1.907176  | -1.221737 | N                 | -0.940679 | -1.506058 | -0.621776 |
|                   | H | 1.731311  | 3.326265  | -0.334998 | N                 | -2.814444 | -1.093394 | 0.627826  |
|                   | H | 1.994359  | 1.227683  | 1.542745  | H                 | -0.664726 | -0.541875 | -0.444459 |
|                   | H | 0.066567  | 1.968532  | -1.319807 | H                 | -0.401410 | -2.082991 | -1.246341 |
|                   | H | -1.309206 | 0.961724  | -0.814013 | H                 | -2.000890 | -3.795970 | -0.941657 |
|                   | H | 0.148467  | 0.103399  | 2.247849  | H                 | -3.419424 | -3.481921 | -0.010358 |
|                   | H | -1.298236 | 0.024413  | 1.257257  | H                 | -3.687622 | -1.385206 | 1.035964  |
|                   | H | 1.650265  | -0.946950 | -2.089702 | H                 | -2.453241 | -0.147742 | 0.779177  |
|                   | H | 0.548950  | -1.571148 | -0.915155 |                   |           |           |           |
|                   | H | 1.278220  | -2.047461 | 1.238719  | Gdm+_Orientation6 |           |           |           |
|                   | H | 2.952119  | -1.900826 | 1.646706  | C                 | 3.915163  | -1.084325 | -0.122616 |
|                   | H | 4.469035  | -1.097991 | 0.048080  | C                 | 2.401980  | -1.154857 | -0.096324 |
|                   | H | 3.926996  | -0.728816 | -1.546935 | O                 | 1.777711  | -0.095940 | 0.234826  |
|                   |   |           |           |           | O                 | 1.828565  | -2.218899 | -0.408276 |
| Gdm+_Orientation4 |   |           |           |           | N                 | -0.898534 | -1.740889 | -0.523440 |
|                   | C | 3.654998  | -1.751330 | -0.245099 | C                 | -1.480462 | -1.100595 | 0.482960  |
|                   | C | 2.335245  | -1.018082 | -0.145427 | N                 | -0.714838 | -0.636201 | 1.481525  |
|                   | O | 1.798283  | -0.573374 | -1.195595 | N                 | -2.802390 | -0.939541 | 0.516312  |
|                   | O | 1.823741  | -0.880051 | 1.001018  | C                 | -3.706562 | -1.493530 | -0.480924 |
|                   | N | -1.040279 | -0.712959 | -0.895544 | N                 | -0.814304 | 3.602271  | -0.348775 |
|                   | C | -1.640401 | -1.188717 | 0.191405  | C                 | -0.013055 | 2.542034  | -0.242254 |
|                   | N | -2.971071 | -1.211213 | 0.265591  | N                 | -0.176439 | 1.490543  | -1.039095 |
|                   | C | -3.847104 | -0.763492 | -0.807224 | N                 | 0.957939  | 2.517238  | 0.665126  |
|                   | N | -0.902696 | -1.661129 | 1.197881  | H                 | 4.353659  | -2.072416 | -0.248891 |
|                   | N | 0.377443  | 1.545691  | 1.197233  | H                 | -4.723969 | -1.268808 | -0.172985 |
|                   | C | 0.272426  | 2.390633  | 0.178174  | H                 | 4.216833  | -0.446950 | -0.957434 |
|                   | N | -0.408754 | 3.530545  | 0.318658  | H                 | 4.280937  | -0.620881 | 0.794261  |
|                   | N | 0.853091  | 2.100833  | -0.982017 | H                 | -3.533873 | -1.045083 | -1.461839 |
|                   | H | 3.976693  | -1.848733 | -1.279276 | H                 | -3.594777 | -2.577689 | -0.544137 |
|                   | H | -4.873200 | -0.936071 | -0.494950 | H                 | -3.189727 | -0.387261 | 1.265570  |
|                   | H | 4.408121  | -1.204916 | 0.325804  | H                 | -1.452895 | -2.097202 | -1.285346 |
|                   | H | 3.552238  | -2.738056 | 0.209490  | H                 | 0.119059  | -1.953340 | -0.494116 |
|                   | H | -3.718117 | 0.303729  | -0.999859 | H                 | -1.140483 | -0.056073 | 2.188470  |
|                   | H | -3.664104 | -1.330815 | -1.722035 | H                 | 0.269665  | -0.463925 | 1.255852  |
|                   | H | -3.388188 | -1.557389 | 1.115650  | H                 | -0.913418 | 1.462124  | -1.724703 |
|                   | H | -1.584835 | -0.350244 | -1.661295 | H                 | 0.437039  | 0.687441  | -0.906123 |
|                   | H | -0.018046 | -0.722385 | -0.994168 | H                 | -0.687551 | 4.409426  | 0.240083  |
|                   | H | -1.351555 | -1.965662 | 2.047122  | H                 | -1.540444 | 3.637346  | -1.046214 |
|                   | H | 0.105899  | -1.486545 | 1.209911  | H                 | 1.564056  | 1.697811  | 0.711598  |
|                   | H | 0.769415  | 2.732542  | -1.762491 | H                 | 1.123250  | 3.307882  | 1.266929  |
|                   | H | 1.270008  | 1.177028  | -1.132309 |                   |           |           |           |
|                   | H | 0.939695  | 0.686208  | 1.127102  | Gdm+ ion          |           |           |           |
|                   | H | -0.070896 | 1.756361  | 2.074749  | C                 | -0.000225 | 0.000054  | -0.000058 |
|                   | H | -0.805564 | 3.793931  | 1.206125  | N                 | -1.296030 | 0.296591  | -0.000700 |
|                   | H | -0.528875 | 4.161974  | -0.456538 | N                 | 0.904915  | 0.973813  | 0.000372  |
|                   |   |           |           |           | N                 | 0.391099  | -1.270362 | -0.000115 |
| Gdm+_Orientation5 |   |           |           |           | H                 | 1.891445  | 0.767953  | -0.003276 |
|                   | C | -2.310541 | 3.037794  | -0.114424 | H                 | 0.628727  | 1.943090  | 0.002653  |
|                   | C | -1.067401 | 2.173350  | -0.153479 | H                 | -1.612242 | 1.253324  | -0.000885 |
|                   | O | -1.102632 | 1.082193  | 0.505170  | H                 | -1.995962 | -0.427975 | 0.003578  |
|                   | O | -0.071605 | 2.549647  | -0.802900 | H                 | -0.279279 | -2.022803 | 0.000023  |
|                   | N | 1.860541  | 0.563810  | -0.758717 | H                 | 1.368779  | -1.514213 | 0.001357  |
|                   | C | 2.194986  | 0.045191  | 0.419743  |                   |           |           |           |
| Gdm+_Orientation3 |   |           |           |           |                   |           |           |           |
|                   | C | -4.788720 | -0.762550 | -0.334774 |                   |           |           |           |





H -0.964523 1.311168 0.086322  
H 0.701637 1.775953 -0.101083  
H 2.275230 1.208636 1.363317  
H 1.869027 0.411153 2.863520

GdmCl\_Orientation3

C -4.578124 -0.641903 0.513803  
  
C -3.199527 -0.040264 0.314260  
O -3.073181 1.203688 0.294805  
O -2.231174 -0.851474 0.178401  
N -0.495006 2.144919 -0.214093  
C 0.452833 1.450548 0.406128  
N 1.745285 1.703943 0.211339  
C 2.229752 2.733820 -0.693146  
N 0.088688 0.500559 1.285307  
C 0.596580 -1.419350 -1.271701  
N 0.281766 -2.207263 -0.241006  
N -0.382295 -0.835842 -1.960035  
N 1.873186 -1.292455 -1.641338  
Cl 2.997976 -1.175171 1.425531  
H -5.334118 0.130821 0.636334  
H 3.311333 2.783797 -0.599083  
H -4.824216 -1.266109 -0.347440  
H -4.563924 -1.289227 1.392533  
H 1.979648 2.504349 -1.732664  
H 1.815727 3.706971 -0.422688  
H 2.400469 1.028693 0.598277  
H -0.256784 2.784121 -0.955272  
H -1.483083 1.868967 -0.069958  
H 0.834449 -0.102906 1.621899  
H -0.809130 0.046179 1.096475  
H 2.584861 -1.511483 -0.949656  
H 2.117156 -0.609888 -2.342956  
H -0.159741 -0.169813 -2.683659  
H -1.287490 -0.767370 -1.492601  
H -0.666420 -2.135738 0.117589  
H 1.020057 -2.435301 0.415920

GdmCl\_Orientation4

C 0.048019 3.881238 -0.099743  
C 0.828055 2.582307 -0.101713  
O 0.233689 1.552766 0.353907  
O 2.000850 2.566438 -0.528845  
N 2.916330 -0.045503 -0.555875  
C 2.767689 -0.776783 0.544365  
N 1.994442 -0.306612 1.529779  
N 3.386566 -1.950788 0.669555  
C 4.315779 -2.478262 -0.319112  
H 0.590846 4.669433 -0.616891  
H 4.719968 -3.410779 0.064474  
H -0.924558 3.723641 -0.568863  
H -0.132447 4.181320 0.934838  
H 3.810872 -2.682346 -1.265802  
H 5.141754 -1.783389 -0.482389  
H 3.189366 -2.503923 1.489353  
H 3.517660 -0.370128 -1.296137  
H 2.586353 0.940780 -0.573171  
H 1.798322 -0.893667 2.325493  
H 1.320657 0.429043 1.286488  
C -1.778836 -0.801762 -0.611764  
N -2.208162 0.212704 0.129262  
N -2.626456 -1.765799 -0.970101  
N -0.498303 -0.842613 -0.985465  
H -2.308527 -2.571887 -1.482963  
H -3.587537 -1.722932 -0.636719  
H -3.179171 0.222580 0.429295  
H -1.543679 0.945711 0.379733  
H 0.097493 -0.057159 -0.734195  
H -0.163820 -1.552058 -1.616543  
Cl -5.332060 -0.709884 0.504190

GdmCl\_Orientation5

C -4.608753 0.010769 -0.410148  
C -3.132250 -0.308107 -0.275100  
O -2.698718 -1.403095 -0.694450  
O -2.398513 0.572170 0.276018  
N -0.338015 -0.726769 1.771134  
C 0.525547 -1.241142 0.882992  
N 0.049326 -1.821556 -0.218524  
N 1.836191 -1.221210 1.118109  
C 2.435343 -0.552619 2.263012  
H -5.039086 0.122764 0.587199  
H 3.514803 -0.643884 2.175003  
H -4.727876 0.965079 -0.925477  
H -5.136317 -0.772986 -0.949514  
H 2.178621 0.510022 2.290621  
H 2.125387 -1.029569 3.194317  
H 2.430555 -1.439087 0.324260  
H 0.031383 -0.206931 2.552855  
H -1.226570 -0.383308 1.389969  
H 0.700830 -1.995880 -0.973974  
H -0.954275 -1.713058 -0.440992  
C 0.552620 1.896565 -0.186799  
N 0.050137 1.114768 -1.139558  
N 1.868156 2.099011 -0.128923  
N -0.282352 2.497915 0.662896  
H 2.274897 2.709788 0.561312  
H 2.477104 1.531430 -0.711782  
H 0.700100 0.538386 -1.669848  
H -0.902636 0.785435 -0.993620  
H -1.243632 2.167283 0.688070  
H 0.075036 3.004574 1.457342  
Cl 2.740022 -0.584151 -1.959292

GdmCl\_Orientation6

C 3.661170 -1.758566 -0.833168  
C 2.199473 -1.497194 -0.521060  
O 1.884969 -1.355256 0.703118  
O 1.385829 -1.404998 -1.465747  
N -1.256886 -0.903022 -0.777382  
C -1.678193 -1.573380 0.290669  
N -0.820742 -2.378115 0.934030  
N -2.945426 -1.478784 0.689860  
C -3.973730 -0.778686 -0.070565  
H 3.785106 -2.129889 -1.848406  
H -4.931187 -0.970089 0.406481  
H 4.208471 -0.816736 -0.735133  
H 4.080908 -2.462461 -0.114904  
H -3.789768 0.297427 -0.084867  
H -4.006154 -1.156487 -1.094184  
H -3.201627 -1.921766 1.558539  
H -1.756100 -0.070530 -1.075008  
H -0.273941 -1.032096 -1.080879  
H -1.144410 -2.913769 1.724407  
H 0.181137 -2.173315 0.870930  
C 1.458334 1.928041 0.642392  
N 1.170256 3.160748 0.224631  
N 0.474388 1.070036 0.893046  
N 2.718412 1.552549 0.864477  
H 0.745241 0.085936 0.962305  
H -0.451277 1.313658 0.543429  
H 0.223684 3.349112 -0.093285  
H 1.903787 3.805582 -0.022354  
H 3.492655 2.158802 0.647041  
H 2.897847 0.588401 1.119862  
Cl -1.971358 2.414416 -0.731364

GdmCl\_Orientation7

C -4.619029 -0.015197 -0.375253  
C -3.134690 -0.310804 -0.281208  
O -2.697147 -1.403013 -0.703385  
O -2.399636 0.582930 0.246967  
N -0.341103 -0.704467 1.753303  
C 0.524394 -1.234763 0.877258  
N 0.052706 -1.815734 -0.225937

N 1.832833 -1.229406 1.126038  
C 2.428342 -0.559122 2.271788  
H -5.028856 0.042410 0.635632  
H 3.507241 -0.666411 2.197235  
H -4.769613 0.957953 -0.844544  
H -5.142926 -0.787194 -0.935134  
H 2.185966 0.506982 2.287005  
H 2.101250 -1.023373 3.203622  
H 2.432450 -1.460550 0.340292  
H 0.024697 -0.191124 2.540759  
H -1.225942 -0.358412 1.365959  
H 0.708659 -1.997738 -0.975680  
H -0.949225 -1.705520 -0.454569  
C 0.551806 1.898237 -0.192348  
N 0.057085 1.120166 -1.152354  
N 1.868186 2.086825 -0.111512  
N -0.291161 2.511086 0.640987  
H 2.268666 2.687577 0.591121  
H 2.481201 1.509954 -0.681266  
H 0.710603 0.537693 -1.671604  
H -0.899024 0.795513 -1.016484  
H -1.255066 2.187785 0.653663  
H 0.058562 3.017299 1.439003  
Cl 2.753580 -0.584798 -1.943457

GdmCl\_Orientation8

C 4.913123 0.203557 -0.102225  
C 3.486087 -0.306004 0.024013  
O 2.970440 -0.329949 1.170880  
O 2.895913 -0.645453 -1.035870  
N 0.332999 -1.531833 -0.849276  
C -0.313717 -1.459691 0.308064  
N 0.320776 -0.993755 1.380850  
N -1.593701 -1.848011 0.396613  
C -2.337481 -2.421873 -0.712566  
C -2.779561 0.945793 0.065590  
N -2.203140 1.029328 -1.130906  
N -4.003269 0.428979 0.190513  
N -2.105810 1.347288 1.137115  
Cl 0.488608 2.600968 -0.335956  
H 5.436516 -0.309090 -0.908536  
H -3.357537 -2.594123 -0.378731  
H 4.872994 1.268040 -0.349600  
H 5.452921 0.089629 0.836409  
H -2.365717 -1.728236 -1.556099  
H -1.908155 -3.373444 -1.035984  
H -2.013286 -1.866806 1.313234  
H -0.129355 -1.903103 -1.662750  
H 1.318550 -1.186201 -0.925989  
H -0.178960 -0.881327 2.248067  
H 1.323241 -0.715879 1.316809  
H -2.734248 0.856090 -1.969869  
H -1.297899 1.496748 -1.199628  
H -1.180418 1.757169 1.010744  
H -2.502868 1.272947 2.060040  
H -4.469448 0.419294 1.083936  
H -4.549180 0.190408 -0.622497

GdmCl\_Orientation9

C -4.451022 0.853201 -0.757193  
C -2.999699 0.537825 -0.456460  
O -2.122421 0.796036 -1.318715  
O -2.735471 0.016541 0.665719  
N 0.511091 1.663499 -0.532825  
C 0.781967 1.373312 0.744688  
N 2.009481 1.574032 1.220606  
C 3.071649 2.222015 0.460622  
N -0.185546 0.926405 1.544106  
N -1.116547 -2.254707 1.204621  
C -0.064614 -2.054316 0.407248  
N 1.131088 -2.563089 0.708197  
N -0.213299 -1.395938 -0.738401  
H -5.038997 -0.063465 -0.683802

H 3.898121 2.412561 1.140215  
H -4.830164 1.545961 -0.003704  
H -4.565008 1.287418 -1.747986  
H 3.416761 1.577275 -0.349992  
H 2.718570 3.173967 0.060124  
H 2.202846 1.278763 2.165159  
H 1.276569 1.597823 -1.191865  
H -0.421844 1.422898 -0.884493  
H -0.023288 0.852033 2.536300  
H -1.106957 0.644958 1.182057  
H 0.637929 -1.147131 -1.243331  
H -1.042286 -0.829170 -0.909035  
H -1.918403 -1.635185 1.078274  
H -0.969625 -2.654737 2.118444  
H 1.290016 -3.012144 1.595729  
H 1.929765 -2.294014 0.139254  
Cl 2.848563 -0.817769 -1.530290

GdmCl\_Orientation10

C 4.420700 0.348807 -0.996202  
C 3.007862 0.216666 -0.464681  
O 2.068718 0.696969 -1.154537  
O 2.827976 -0.387396 0.629000  
N -0.418436 -0.751799 -0.894604  
C -0.429876 -1.842701 -0.134825  
N -1.579288 -2.458739 0.134828  
C -2.859413 -2.039839 -0.420263  
N 0.728414 -2.340893 0.318496  
N 0.015159 2.034394 0.348983  
C -0.351708 1.294378 1.398781  
N 0.553994 0.572771 2.053429  
N -1.619441 1.346865 1.821962  
H 4.556004 1.319840 -1.471449  
H -3.611164 -2.759846 -0.108637  
H 5.153685 0.204374 -0.205136  
H 4.571427 -0.419819 -1.758709  
H -3.140621 -1.047869 -0.060591  
H -2.814191 -2.024863 -1.511237  
H -1.559745 -3.239849 0.771938  
H -1.272854 -0.228535 -1.081156  
H 0.474611 -0.276889 -1.069646  
H 0.710360 -3.160137 0.906007  
H 1.535825 -1.715939 0.407814  
H -1.928562 0.708272 2.538914  
H -2.318121 1.666064 1.156404  
H -0.740862 2.346035 -0.256137  
H 0.875743 1.763821 -0.133507  
H 1.455049 0.351111 1.611027  
H 0.253624 -0.024157 2.809038  
Cl -2.815410 1.610573 -1.242304

GdmCl\_Orientation11

C 1.483788 3.951052 -0.453189  
C 1.740981 2.482591 -0.181976  
O 0.753155 1.690030 -0.311031  
O 2.882422 2.107816 0.155666  
N 2.794134 -0.611493 0.759200  
C 2.221114 -1.428107 -0.126326  
N 1.489311 -0.898992 -1.106720  
N 2.369751 -2.749497 -0.033784  
C 1.706190 -3.697029 -0.917466  
N -1.858165 0.712618 -0.081015  
C -1.642029 -0.109640 0.939057  
N -2.606687 -0.939012 1.336922  
N -0.458536 -0.092718 1.554606  
Cl -4.980456 -0.049481 -0.698640  
H 1.043638 4.066267 -1.444919  
H 1.994418 -4.698729 -0.611857  
H 0.757178 4.323149 0.272143  
H 2.401181 4.531407 -0.382386  
H 0.620543 -3.608779 -0.838697  
H 2.015999 -3.549360 -1.954209  
H 2.984132 -3.105919 0.681825

H 0.978588 -1.495430 -1.737515  
H 1.205058 0.083753 -1.011279  
H 3.400054 -0.999799 1.465127  
H 2.855704 0.404458 0.556954  
H -0.231597 -0.776554 2.258183  
H 0.273161 0.497917 1.165603  
H -1.102490 1.323391 -0.385967  
H -2.776153 0.720015 -0.517759  
H -3.515730 -0.888086 0.880743  
H -2.489468 -1.508835 2.158742

GdmCl\_Orientation12

C 1.849417 -3.733425 -0.485166  
C 1.804689 -2.218442 -0.491865  
O 1.204911 -1.655327 0.481405  
O 2.353106 -1.590076 -1.419262  
N -1.372518 -2.163014 1.405638  
C -2.013975 -1.190738 0.760488  
N -3.335234 -1.049526 0.860680  
N -1.321856 -0.338817 0.008674  
N 1.556086 1.075779 -1.256549  
C 1.789992 1.699077 -0.097971  
N 2.043331 0.962114 0.981094  
N 1.751989 3.028763 -0.017413  
C 1.882983 3.763070 1.232829  
Cl -3.754843 1.551384 -1.060838  
H 2.573970 -4.056511 0.267193  
H 1.720350 4.816173 1.022006  
H 0.875677 -4.134442 -0.198685  
H 2.148201 -4.122002 -1.456949  
H 1.130754 3.434468 1.952552  
H 2.881075 3.643554 1.659953  
H 1.646620 3.550345 -0.874121  
H 2.204411 1.399173 1.873920  
H 1.848057 -0.047778 0.934345  
H 1.395130 1.627401 -2.084825  
H 1.863710 0.092075 -1.369434  
H -1.817493 0.392381 -0.494953  
H -0.324177 -0.488816 -0.100466  
H -0.362591 -2.248511 1.267258  
H -1.878257 -2.842213 1.950031  
H -3.879979 -1.660709 1.446526  
H -3.788473 -0.289245 0.357995

GdmCl\_Orientation13

C -2.854219 -3.330029 -0.671810  
C -2.068182 -2.074431 -0.358352  
O -2.296618 -1.494779 0.739889  
O -1.210143 -1.667703 -1.186996  
N 0.150162 -0.426517 1.777362  
C 1.306773 -0.495597 1.121161  
N 1.378553 -1.133414 -0.043273  
N 2.407194 0.064057 1.626558  
N -2.532031 1.332672 0.604526  
C -1.569107 1.894164 -0.130908  
N -1.314782 3.198871 -0.027196  
C -0.329084 3.893838 -0.842188  
N -0.885250 1.147601 -0.992115  
H -2.717562 -3.633541 -1.707279  
H -0.365434 4.948594 -0.584597  
H -2.505802 -4.129416 -0.013627  
H -3.911030 -3.166753 -0.459709  
H 0.678929 3.523267 -0.642288  
H -0.558966 3.788184 -1.904355  
H -1.835800 3.728971 0.653819  
H -0.126397 1.546681 -1.520973  
H -1.057966 0.136924 -1.080816  
H -3.004886 1.879495 1.306620  
H -2.575443 0.311028 0.674188  
H 2.266189 -1.123613 -0.540250  
H 0.523408 -1.439570 -0.508905  
H -0.704403 -0.862035 1.412722  
H 0.098942 0.063286 2.656256

H 2.396079 0.507609 2.530284  
H 3.273525 0.016657 1.094209  
Cl 4.519806 -0.553322 -0.771582

GdmCl\_Orientation14

C -2.988091 -3.420657 0.173707  
N -2.090570 -2.630226 -0.656220  
C -2.008443 -1.301239 -0.594368  
N -2.700045 -0.618936 0.310927  
N -1.238825 -0.626609 -1.458212  
O -2.774965 2.138311 0.119548  
C -1.610109 2.566735 -0.020872  
O -0.598068 1.808971 -0.158464  
C -1.358603 4.060939 -0.019728  
N 1.951021 0.661565 0.012326  
C 1.644343 -0.284260 0.893718  
N 0.435266 -0.286183 1.455330  
N 2.547948 -1.210916 1.209744  
Cl 5.020893 -0.257145 -0.668192  
H -2.292713 4.618150 0.000176  
H -2.922898 -4.454761 -0.152479  
H -0.763206 4.316183 0.859868  
H -0.775675 4.335403 -0.900221  
H -2.701303 -3.269977 1.226406  
H -4.020067 -3.084911 0.054099  
H -1.496437 -3.109474 -1.315086  
H -3.291313 -1.104698 0.966001  
H -2.752411 0.418983 0.256977  
H -0.644324 -1.137212 -2.092101  
H -0.958899 0.321681 -1.186905  
H -0.242872 0.403159 1.137105  
H 0.159038 -1.012680 2.095368  
H 2.331387 -1.944481 1.864531  
H 3.464319 -1.175903 0.767250  
H 2.878265 0.661353 -0.404020  
H 1.250058 1.362428 -0.218376

GdmCl\_Orientation15

C 4.601514 0.042884 -0.680895  
C 3.150485 -0.344094 -0.475139  
O 2.741084 -1.444666 -0.902437  
O 2.411495 0.490138 0.136677  
N 0.049044 -1.881416 -0.382802  
C -0.421546 -1.501641 0.799387  
N -1.667720 -1.797948 1.164600  
C -2.576187 -2.593093 0.349768  
N 0.392313 -0.845670 1.637322  
N 0.690302 2.538064 1.031551  
C -0.366344 2.128256 0.327679  
N -0.181830 1.319408 -0.712155  
N -1.595240 2.548279 0.623428  
H 5.143586 -0.728568 -1.223383  
H -3.472345 -2.780812 0.935353  
H 4.647513 0.984992 -1.229987  
H 5.068529 0.208263 0.291819  
H -2.856791 -2.051325 -0.556307  
H -2.120644 -3.553443 0.100065  
H -2.010215 -1.406763 2.028500  
H -0.561625 -2.321873 -1.052070  
H 1.050027 -1.734725 -0.618486  
H 0.024185 -0.498611 2.509509  
H 1.211251 -0.375423 1.236069  
H 0.727465 0.869753 -0.791203  
H -1.004897 0.913901 -1.155598  
H -2.381370 2.151246 0.113244  
H -1.762923 3.147160 1.415334  
H 0.566442 3.087658 1.866444  
H 1.588415 2.094929 0.853769  
Cl -3.247814 0.592410 -1.415023

GdmCl

N -0.585681 1.145407 -0.004403





C -1.237324 1.454823 -0.126958  
C -0.330077 2.638912 0.164238  
O 0.613580 2.357203 1.184479  
C -2.240379 1.767428 -1.226438  
O -3.091514 0.655646 -1.449166  
N 1.543150 -1.164838 -1.370867  
C 2.341785 -0.657334 -0.439742  
N 3.588029 -0.284835 -0.726782  
C 4.473627 0.373156 0.223713  
N 1.854991 -0.462044 0.798158  
H -3.257451 -1.578072 1.236821  
H 5.364772 0.687749 -0.312195  
H -3.274270 -2.645673 -0.201693  
H -2.750398 -3.260702 1.375903  
H 3.991275 1.255792 0.647226  
H 4.772892 -0.305196 1.025911  
H 3.942288 -0.494737 -1.647548  
H 2.515778 -0.390698 1.559332  
H 0.915196 -0.857534 1.020897  
H 1.872403 -1.243805 -2.320538  
H 0.656063 -1.639922 -1.099707  
H -0.622709 0.602977 -0.452331  
H -2.828091 2.649326 -0.940564  
H -1.728828 1.979301 -2.166398  
H 0.173918 2.943759 -0.761465  
H -0.930681 3.478697 0.521822  
H 1.080083 1.542558 0.956366  
H -1.564127 0.278688 1.390812  
H -3.398128 0.378614 -0.576810

C 0.268883 -3.002361 -0.004757  
C 1.180241 -1.792481 -0.186291  
O 1.601935 -1.303196 1.087787  
C 2.431193 -2.118164 -0.976801  
O 3.283627 -0.987194 -1.074545  
N 0.246076 1.245419 0.591143  
C 0.224314 2.462479 0.060955  
N 1.334340 3.206509 0.033948  
C 2.624681 2.722659 0.501005  
N -0.924522 2.937703 -0.420957  
H -4.061400 -1.737546 0.437885  
H 3.353939 3.515998 0.361643  
H -5.089753 -0.412060 -0.185321  
H -4.104262 -1.384408 -1.290802  
H 2.587045 2.468310 1.562635  
H 2.944626 1.851305 -0.075532  
H 1.275567 4.134562 -0.354710  
H 1.112604 0.804735 0.871448  
H -0.574019 0.622610 0.455373  
H -0.953836 3.842660 -0.861523  
H -1.769464 2.342062 -0.416064  
H 0.625204 -0.997667 -0.701029  
H 2.956264 -2.953194 -0.497903  
H 2.166248 -2.407950 -1.059207  
H -0.187018 -3.261001 -0.967121  
H 0.853386 -3.858489 0.343793  
H -1.268201 -1.998574 0.670483  
H 0.913124 -1.551083 1.720347  
H 3.529750 -0.743840 -0.175426

C 1.665926 -1.471118 -0.101425  
N 1.033289 -1.120755 1.014216  
N 2.983335 -1.286386 -0.209860  
H 3.437043 -1.636425 -1.039839  
O -0.135787 0.960929 -1.123768  
C -0.167333 1.809626 0.011669  
C 1.058054 2.697431 -0.101190  
O 2.231635 1.903417 -1.193285  
C -1.459234 2.602576 0.100817  
O -2.585115 1.748054 0.227880  
H -4.018299 -2.432817 -0.628015  
H -3.934598 -2.311717 1.157334  
H -4.403528 -0.910352 0.193981  
C 3.816695 -0.784321 0.875383  
H 1.452173 -2.201472 -1.974327  
H -0.032261 -1.913887 -1.191378  
H 1.535297 -0.596197 1.713898  
H 0.000789 -1.083220 1.050224  
H -0.073880 1.207284 0.924937  
H 0.962689 3.343019 -0.983478  
H 1.158785 3.326262 0.784289  
H -1.397942 3.294026 0.950580  
H -1.604840 3.184927 -0.812472  
H -2.361272 1.035357 0.169575  
H -0.773343 0.229164 -1.024982  
H 2.049364 1.236809 -0.868028  
H 4.845073 -0.768934 0.524965  
H 3.524384 0.234593 1.136148  
H 3.754641 -1.434657 1.750668

Glycerol\_Orientation3

C -4.493587 -0.812557 -0.860802  
C -3.187495 -0.266760 -0.316196  
O -3.213422 0.577717 0.604902  
O -2.116833 -0.712744 -0.838611  
O 1.810174 -0.383143 0.940144  
C 1.556710 -1.400362 -0.022058  
C 2.899417 -1.992846 -0.396211  
O 3.782620 -0.990370 -0.875457  
C 0.597188 -2.433028 0.554647  
O -0.528950 -1.788564 1.121441  
N -0.729094 1.643633 1.262277  
C 0.049475 1.908671 0.210058  
N -0.246292 1.351017 -0.960350  
N 1.110421 2.709271 0.328123  
C 2.157292 2.773372 -0.681449  
H -4.519526 -1.893040 -0.706199  
H 2.968220 3.380229 -0.288576  
H -5.349957 -0.350843 -0.373977  
H -4.537071 -0.635936 -1.936873  
H 2.536728 1.771853 -0.901945  
H 1.791658 3.243393 -1.596407  
H 1.308131 3.084057 1.243094  
H 0.350899 1.500975 -1.757382  
H -0.954484 0.599511 -0.997446  
H -0.561092 2.126545 2.131517  
H -1.662686 1.223844 1.095870  
H 1.104447 -0.943879 -0.913353  
H 3.329829 -2.494471 0.479214  
H 2.779566 -2.725170 -1.196137  
H 0.306195 -3.146598 -0.223998  
H 1.089449 -2.979348 1.363776  
H -1.082756 -1.423681 0.400580  
H 0.976888 -0.228844 1.407726  
H 3.837616 -0.318163 -0.187102

Glycerol\_Orientation5

C -3.422367 1.977788 0.358650  
C -1.921531 1.784607 0.254977  
O -1.467071 1.429025 -0.876456  
O -1.213404 1.951860 1.271979  
O -2.246936 -1.081917 -1.693596  
C -0.968531 -1.639809 -1.437485  
C -0.687032 -1.650497 0.059197  
C 0.651159 -2.283640 0.381418  
O 1.008745 -2.136075 1.745818  
O -1.710830 -2.366148 0.736732  
N 1.365439 0.951946 1.353018  
C 1.976983 0.927267 0.150370  
N 3.288235 0.707590 0.073819  
C 4.014530 0.610080 -1.184101  
N 1.247176 1.072359 -0.945106  
H -3.904726 1.002433 0.249962  
H 5.063788 0.449593 -0.953967  
H -3.700243 2.410169 1.317400  
H -3.772979 2.609863 -0.457841  
H 3.656702 -0.232993 -1.779483  
H 3.922892 1.534887 -1.756973  
H 3.794142 0.567964 0.935239  
H 1.681516 0.998378 -1.851965  
H 0.217523 1.248890 -0.866773  
H 1.948059 1.140889 2.157393  
H 0.409366 1.359200 1.373394  
H -0.676459 -0.611734 0.418606  
H 0.605052 -3.356689 0.181835  
H 1.419354 -1.846998 -0.270989  
H -0.183486 -1.086570 -1.963794  
H -0.984210 -2.666770 -1.813036  
H -2.163534 -0.125583 -1.518185  
H -2.546464 -2.057970 0.364573  
H 1.084447 -1.188977 1.918511

Glycerol\_Orientation7

C 3.497961 2.158403 -0.217495  
C 2.108468 1.556728 -0.161610  
O 1.550657 1.456600 0.964403  
O 1.596757 1.142563 -1.237902  
N -1.210800 1.110257 -1.313240  
C -1.896344 1.151508 -0.172032  
N -3.221656 0.994032 -0.174452  
C -4.033679 1.003336 1.032843  
N -1.249887 1.382516 0.968212  
O 0.905866 -1.557412 -1.239304  
C 0.431460 -1.734848 0.087807  
C 1.535174 -2.191535 1.028112  
O 2.572247 -1.231159 1.130414  
C -0.712495 -2.728431 0.009792  
O -1.735503 -2.734950 -0.840111  
H -3.662904 0.751932 -1.047896  
H 3.701867 2.577979 -1.200958  
H 3.623942 2.912818 0.557584  
H 4.216449 1.355185 -0.029814  
H -1.689031 0.930058 -2.181331  
H -0.181023 1.145698 -1.307352  
H -1.741864 1.333515 1.845707  
H -0.217496 1.432917 0.982234  
H 0.033344 -0.782754 0.459967  
H -0.333135 -3.689062 -0.361874  
H -1.154157 -2.884454 0.995273  
H 1.102320 -2.405528 2.013685  
H 1.989398 -3.108299 0.643948  
H 2.174785 -0.369375 1.330807  
H 1.263867 -0.655360 -1.312229  
H -1.284096 -1.870185 -1.611476  
H -5.073847 0.899046 0.737211  
H -3.773442 0.172476 1.692959  
H -3.922043 1.949651 1.565405

Glycerol\_Orientation4

C -4.141460 -0.934808 -0.294966  
C -2.971742 0.023867 -0.163466  
O -3.156839 1.240555 -0.376582  
O -1.844779 -0.478582 0.134938  
O -0.708659 -2.742956 0.985154

Glycerol\_Orientation6

C -3.760037 -1.794595 0.214612  
C -2.322277 -1.324947 0.125444  
O -1.747274 -1.357165 -0.996436  
O -1.778232 -0.876831 1.171444  
N 0.984396 -2.055275 -1.092907

Glycerol\_Orientation8

C -3.153676 -1.923938 0.321615  
C -1.638350 -1.939825 0.220605  
O -1.115629 -1.786840 -0.921953  
O -0.983859 -2.067460 1.283118  
H -2.813667 0.668496 -0.960143

C -2.364181 1.576940 -0.542028  
C -0.894455 1.303309 -0.265908  
C -0.128510 2.555871 0.118648  
O 1.249301 2.260701 0.303361  
O -0.265945 0.787835 -1.428785  
N 1.699368 -1.847601 -1.002404  
C 2.123774 -0.946763 -0.109270  
N 1.456336 -2.042356 -1.030951  
N 3.231276 -0.231975 -0.329560  
C 3.929258 0.500364 0.723399  
H 3.704975 -0.367647 -1.209714  
H -3.619226 -2.043307 -0.655043  
H -3.494066 -2.703885 1.002939  
H -3.455012 -0.960823 0.745458  
H 2.211341 -1.957309 -1.864233  
O 0.688244 -2.042356 -1.013546  
H 1.587578 0.054074 1.551411  
H 0.567163 -1.324057 1.161279  
H -0.821159 0.577090 0.554013  
H -0.255191 3.311090 -0.667623  
H -0.506940 2.959543 1.057334  
O -2.977380 1.932168 0.688992  
H -2.457841 2.382544 -1.280038  
H -0.521338 -0.150012 -1.483316  
H 1.532230 1.800838 -0.498043  
H 4.879054 0.839818 0.319090  
H 3.354001 1.371424 1.040768  
H 4.117544 -0.149896 1.579840  
H -3.901610 2.139518 0.526423

C 0.774848 1.493683 -0.297689  
C -0.244425 2.581275 -0.593616  
O -1.567644 2.078712 -0.467445  
C 2.206285 2.016874 -0.298090  
O 2.416519 2.926387 0.769930  
N -1.404502 -1.029644 -0.900535  
C -1.941153 -1.123536 0.311697  
N -1.310006 -1.833322 1.254279  
N -3.122919 -0.554963 0.565200  
C -4.003310 -0.042743 -0.480374  
H 2.895391 1.167114 -0.217985  
H -3.491499 -0.640994 1.500275  
H 3.458828 -3.239919 0.418705  
H 3.533654 -2.852029 -1.321732  
H 3.976184 -1.638355 -0.093556  
H -1.724309 -1.900360 2.171137  
H -0.286459 -1.894704 1.187366  
H -1.723102 -0.280990 -1.499782  
H -0.451257 -1.412707 -1.062478  
H 0.686577 0.697052 1.046053  
H -0.088700 3.422680 0.090626  
H -0.128772 2.936727 -1.618438  
H 2.422013 2.548271 -1.227635  
H 0.810470 0.373023 1.044872  
H -1.610104 1.662111 0.403142  
H -4.962947 0.186463 -0.024975  
H -3.596253 0.868937 -0.920086  
H -4.149975 -0.796063 -1.256765  
H 2.030822 2.513873 1.552642

C 0.426225 1.742575 -0.086431  
C 1.745427 2.468799 0.113969  
H 1.956606 3.106963 -0.747775  
C -0.712299 2.697229 -0.405617  
O -1.947753 1.998743 -0.440540  
N -1.051437 -1.964072 1.160324  
C -1.774954 -1.303342 0.246209  
N -1.253317 -1.080975 -0.953552  
N -3.023693 -0.915547 0.520123  
C -3.977650 -0.517874 -0.511838  
O 2.837045 1.569283 0.235508  
H -3.380010 -1.113797 1.442923  
H 4.006442 -2.240806 0.487015  
H 3.858379 -2.326987 -1.294152  
H 4.092730 -0.766479 -0.476416  
H -1.447422 -2.122569 2.074227  
H -0.033439 -1.881542 1.102031  
H -1.671746 -0.367371 -1.533465  
H -0.259161 -1.340208 -1.116752  
H 0.538572 1.021002 -0.907194  
H -0.747301 3.492750 0.349564  
H -0.566536 3.152726 -1.385547  
H 1.666322 3.102266 1.006172  
H 0.542029 2.010867 1.112293  
H -1.986251 1.496377 0.384573  
H -4.950128 -0.406263 -0.040020  
H -3.695716 0.437671 -0.956496  
H -4.043443 -1.282423 -1.288467  
H 2.559659 0.808270 0.766321

#### Glycerol\_Orientation9

C -2.097418 3.358575 -0.365793  
C -0.927192 2.410150 -0.186341  
O -0.804272 1.841909 0.939967  
O -0.161334 2.214863 -1.158566  
O -1.372481 -0.824359 1.207000  
C -1.527469 -1.090553 -0.180466  
C -0.841293 -2.405833 -0.511645  
O 0.561249 -2.352382 -0.304518  
C -3.016833 -1.125167 -0.507715  
O -3.692791 -2.040841 0.340235  
N 1.873924 0.398076 -0.877294  
C 2.417233 0.321940 0.348716  
N 1.761258 0.849536 1.376324  
N 3.577659 -0.306233 0.528127  
C 4.343112 -0.916829 -0.549625  
H -3.430940 -0.116927 -0.387702  
H 3.947041 -0.352168 1.465327  
H -2.309313 3.886271 0.563079  
H -1.907833 4.063564 -1.173108  
H -2.978899 2.765451 -0.624655  
H 2.087987 0.684991 2.315782  
H 0.815663 1.246520 1.236360  
H 2.480217 0.249939 -1.671546  
H 1.089257 1.075558 -1.009578  
H -1.058272 -0.288809 -0.768303  
H -1.225552 -3.194605 0.137840  
H -1.068727 -2.672315 -1.550822  
H -3.186120 -1.448398 -1.536804  
H -1.243376 0.136309 1.295658  
H 0.898614 -1.567879 -0.754697  
H 5.200315 -1.416523 -0.107248  
H 3.742956 -1.660132 -1.078028  
H 4.705913 -0.164835 -1.253366  
H -3.392632 -1.842880 1.235981

#### Glycerol\_Orientation10

C 3.302180 -2.463708 -0.332273  
C 1.869827 -1.969802 -0.251869  
O 1.479303 -1.531085 0.873544  
O 1.151729 -2.014021 -1.275634  
O 0.454581 0.984146 0.992279

#### Glycerol\_Orientation11

C -2.682981 -2.525346 -0.366901  
C -1.226024 -2.115327 -0.427334  
O -0.441126 -2.548959 0.447940  
O -0.885603 -1.311485 -1.347337  
N 1.810265 -1.090320 0.816820  
C 2.355610 -0.398341 -0.169916  
N 1.633843 -0.166499 -1.286822  
N 3.581808 0.110763 -0.059340  
C 4.432832 -0.088978 1.104406  
O -2.073633 1.117968 -0.983536  
C -1.306654 1.444940 0.159285  
C -2.203977 1.568461 1.375941  
O -2.713977 0.275537 1.673738  
C -0.534578 2.736060 -0.081500  
O 0.328238 2.648498 -1.202229  
H -1.631315 1.961816 2.223420  
H 3.898042 0.733460 -0.786980  
H -3.100028 -2.619131 -1.368986  
H -2.806011 -3.453491 0.188366  
H -3.214598 -1.725609 0.157221  
H 2.146489 0.010505 -2.139940  
H 0.725517 -0.664666 -1.377661  
H 2.300101 -1.186354 1.692588  
H 0.936410 -1.648848 0.662307  
H -0.585570 0.638148 0.357247  
H -1.236163 3.548446 -0.289863  
H 0.030705 2.993008 0.822345  
H -3.019653 2.264587 1.147664  
H -1.793853 0.232404 -1.275819  
H 0.804890 1.809020 -1.154327  
H 5.398346 0.363325 0.896446  
H 4.009307 0.386031 1.992150  
H 4.582094 -1.154076 1.290135  
H -3.342675 0.352524 2.396590

#### Glycerol\_Orientation12

C 3.617688 -1.748631 -0.404534  
C 2.122475 -1.537500 -0.273613  
O 1.702004 -1.086209 0.839791  
O 1.384539 -1.791088 -1.249502  
O 0.046424 1.051294 1.097747

#### Glycerol molecule

C 1.218130 -0.125399 0.685056  
C 0.026885 0.800107 0.446008  
O 0.137613 1.409561 -0.833956  
O 1.407622 -1.012505 -0.411004  
C -1.309362 0.079149 0.572487  
O -1.408333 -1.016812 -0.337109  
H 2.132672 0.464728 0.759487  
H 1.079393 -0.674064 1.622446  
H 0.050069 1.598424 1.194245  
H -2.125166 0.787764 0.405959  
H -1.409650 -0.337795 1.576491  
H -1.623657 -0.668563 -1.208106  
H 0.597385 0.782694 -1.406342  
H 0.589826 -1.518281 -0.508939

#### Two guanidinium ions

##### 2Gdm\*\_Orientation1

C -2.123731 -1.166154 2.419213  
C -0.885741 -0.867455 1.606943  
O 0.246135 -1.033753 2.108148  
O -1.053303 -0.465536 0.405488  
N 1.203213 1.217340 -0.292268  
C 2.170720 1.563264 0.552918  
N 2.116700 1.145161 1.818868  
N 3.171786 2.338290 0.140679  
C 3.268282 2.887757 -1.204482  
N 0.675073 -1.895404 -1.419223  
C 1.923805 -2.117750 -1.018464  
N 2.244402 -1.940408 0.258007  
N 2.845843 -2.519270 -1.894789  
H -2.871969 -0.386638 2.267130  
H 4.138321 3.537355 -1.236374  
H -2.548344 -2.107932 2.061510  
H -1.884042 -1.262221 3.475471  
H 3.398191 2.096823 -1.946279  
H 2.384402 3.481645 -1.444410  
H 3.913249 2.537415 0.794227  
H 1.251370 1.483121 -1.262791  
H 0.404125 0.655255 0.010577  
H 2.855737 1.380872 2.461998  
H 1.451027 0.419071 2.082176



H -0.387452 -2.331965 2.902548  
H -0.073420 -2.754202 1.204455  
H -1.690903 -2.999041 1.901646  
H -2.214928 -0.826400 1.232616  
H -1.921499 1.273605 1.017577  
H -0.291457 1.935020 0.853255  
H 4.577105 -1.598142 0.247490  
H 3.594305 -0.104206 0.375308  
H 4.444481 -0.487910 -1.153736  
H 1.553917 0.081700 -0.775569  
H 2.281049 -0.363665 -2.347833  
H 0.906241 -1.310287 -1.691442  
H 3.648885 -2.347063 -2.518398  
H 2.240872 -3.295535 -1.939366  
H 3.803745 -3.418088 -1.088740  
H -5.166242 1.199512 -2.065447  
H -5.670713 1.324519 -0.349102  
H -4.216549 2.191426 -0.912555  
H -3.129355 -0.057454 -2.598643  
H -2.239277 0.982447 -1.443297  
H -2.198344 -0.793171 -1.256458  
H -5.138187 -1.237730 -1.811851  
H -4.141384 -1.951763 -0.503843  
H -5.620683 -1.041751 -0.096142

2TMAO\_Orientation3

C -2.563690 4.473229 0.189542  
C -1.774103 3.190091 -0.045395  
O -2.427004 2.112295 -0.069390  
O -0.527810 3.279658 -0.175962  
N -0.785718 -0.135093 -0.395390  
C 0.535635 -0.116199 -0.507266  
N 1.236057 -1.254083 -0.578506  
C 0.603360 -2.558087 -0.660137  
N 1.190593 1.049284 -0.559132  
O -2.571961 -2.211420 0.023216  
N -3.805503 -1.626294 0.226424  
C -4.815897 -2.698500 0.431872  
C -4.177933 -0.807671 -0.962844  
C -3.756312 -0.747100 1.430036  
O 3.796178 -0.117679 -0.810498  
N 4.680161 -0.251985 0.238964  
C 4.021848 0.181799 1.504169  
C 5.093625 -1.678725 0.354068  
C 5.876019 0.595627 -0.021678  
H -1.979950 5.352119 -0.079288  
H -3.496925 4.452485 -0.373859  
H -2.818926 4.532052 1.251197  
H -1.299596 0.754731 -0.294799  
H -1.331176 -1.006105 -0.270284  
H 0.019672 -2.663362 -1.579208  
H -0.059472 -2.728925 0.191025  
H 1.385720 -3.134310 -0.651115  
H 2.245186 -1.138523 -0.713338  
H 2.205045 1.015273 -0.634116  
H 0.657569 1.916566 -0.431209  
H -4.159180 -1.465695 -1.828418  
H -3.441353 -0.012319 -1.064149  
H -5.171881 -0.383364 -0.819714  
H -3.043741 0.052112 1.231515  
H -4.745960 -0.330415 1.618804  
H -3.429887 -1.361163 2.266145  
H -5.799233 -2.255778 0.590209  
H -4.506770 -3.276554 1.299774  
H -4.811233 -3.324748 -0.457177  
H 6.583014 0.502856 0.802089

H 6.318099 0.253755 -0.954441  
H 5.531162 1.621853 -0.123209  
H 4.708188 0.053863 2.340994  
H 3.745806 1.227805 1.388888  
H 3.131467 -0.430345 1.636177  
H 5.813104 -1.792076 1.164689  
H 4.199180 -2.266453 0.551094  
H 5.532413 -1.967757 -0.597921

2TMAO\_Orientation4

C -4.111937 -2.441080 -1.313984  
C -2.840643 -2.092877 -0.554355  
O -2.975609 -1.599907 0.598474  
O -1.737905 -2.281254 -1.125894  
N -0.735264 -0.849350 2.013465  
C 0.458416 -0.900048 1.420065  
N 0.584712 -1.501132 0.236578  
N 1.537740 -0.369664 1.998665  
C 1.499958 0.319762 3.274803  
O 3.359610 -0.923943 -0.033195  
N 3.848697 0.029594 -0.899981  
C 4.080670 -0.598836 -2.230102  
C 2.860933 1.137709 -1.035147  
C 5.132147 0.564346 -0.366682  
C -2.948290 1.766573 0.935874  
N -2.371844 2.096246 -0.398554  
O -3.297908 1.832675 -1.380232  
C -1.157168 1.265045 -0.625822  
C -2.001080 3.537440 -0.437604  
H -3.910910 -3.151818 -2.113777  
H -4.867605 -2.835531 -0.635158  
H -4.506715 -1.521937 -1.755933  
H -1.582796 -1.168779 1.502595  
H -0.843407 -0.341938 2.876584  
H 1.152098 -0.340822 4.073003  
H 0.859471 1.205644 3.234348  
H 2.510671 0.640158 3.515245  
H 2.402640 -0.426900 1.448391  
H 1.509741 -1.472712 -0.192778  
H -0.253086 -1.828493 -0.269921  
H -0.768374 1.524092 -1.608790  
H -1.468322 0.222268 -0.605038  
H -0.415519 1.465751 0.150224  
H -3.195903 0.706214 0.926199  
H -2.223350 1.989697 1.720202  
H -3.844318 2.371974 1.056582  
H -1.261205 3.756019 0.332755  
H -2.910442 4.111494 -0.274810  
H -1.600399 3.743341 -1.427872  
H 4.471334 0.142462 -2.926309  
H 4.791765 -1.408722 -2.086714  
H 3.127442 -0.991448 -2.576657  
H 5.528523 1.317039 -1.047586  
H 4.925159 0.995621 0.610142  
H 5.818775 -0.273200 -0.271172  
H 2.705918 1.565275 -0.046304  
H 3.242234 1.890387 -1.724528  
H 1.934757 0.706220 -1.409640

2TMAO\_Orientation5

C -3.312084 -0.137921 2.538805  
C -2.128370 -0.855953 1.915873  
O -2.332420 -1.977612 1.381688  
O -1.016692 -0.261114 1.919768  
N 0.969011 -1.388454 0.314555

C 0.712189 -2.421997 -0.469782  
N 1.655336 -2.906234 -1.289681  
C 2.960356 -2.283645 -1.448924  
N -0.501531 -2.984618 -0.448194  
C -1.586320 2.178080 -0.405186  
N -2.411055 1.335250 -1.315623  
C -1.729455 0.026316 -1.520419  
C -2.569740 2.023341 -2.625803  
O -3.646999 1.125462 -0.751421  
H -4.063755 -0.845573 2.886543  
H -2.991716 0.511161 3.353456  
H -3.748512 0.480563 1.747338  
H 0.221802 -1.045381 0.943717  
H 1.886856 -0.898303 0.348541  
H 3.463227 -2.193049 -0.485239  
H 2.875937 -1.287307 -1.889505  
H 3.557022 -2.916228 -2.101472  
H 1.390700 -3.639968 -1.927621  
H -0.678020 -3.817339 -0.986128  
H -1.197912 -2.666102 -2.659333  
H -2.364877 -0.573230 -2.168840  
H -1.636310 -0.442551 -0.544282  
H -0.747538 0.175934 -1.973164  
H -1.484102 1.633647 0.532996  
H -0.610904 2.367622 -0.856340  
H -2.122947 3.112212 -0.254057  
H -1.595235 2.186798 -3.086748  
H -3.071138 2.969785 -2.438074  
H -3.192129 1.388176 -3.252299  
O 3.217496 0.140094 0.675221  
N 2.873839 1.469812 0.549255  
C 4.042246 2.307433 0.934087  
C 2.502686 1.750887 -0.865370  
C 1.720099 1.780367 1.441897  
H 2.230646 2.800381 -0.979164  
H 3.362926 1.503680 -1.483348  
H 1.665266 1.102372 -1.116904  
H 3.794350 3.362940 0.824357  
H 4.285435 2.071260 1.967246  
H 4.867666 2.032581 0.282018  
H 1.462453 2.836595 1.357935  
H 0.878162 1.155796 1.146442  
H 2.022723 1.537158 2.457972

Salt-bridge

C 3.955290 -0.253965 -0.042088  
C 2.443915 -0.094195 0.016265  
O 1.745805 -1.141719 0.020894  
N 1.981462 1.075736 0.027541  
O -0.961340 -0.895211 0.026842  
C -1.520667 0.309283 0.009680  
N -0.739947 1.388053 0.008194  
N -2.852907 0.435533 -0.009671  
C -3.765602 -0.696496 -0.031713  
H 4.264123 -1.204329 0.390621  
H -4.778173 -0.310008 -0.109033  
H 4.259572 -0.241776 -1.092280  
H 4.451458 0.574219 0.462303  
H -3.572914 -1.333318 -0.897622  
H -3.688954 -1.287059 0.884103  
H -3.239188 1.365842 0.016129  
H -1.538329 -1.718022 0.087125  
H 0.080547 -0.993801 0.029232  
H -1.151993 2.304202 -0.065124  
H 0.297456 1.285517 0.016639



**Glycerol**

## Glycerol\_Orientation1

C -4.136257 -0.405848 -0.025097  
 C -2.711322 -0.929618 -0.094113  
 O -2.470685 -2.005668 -0.675324  
 O -1.820873 -0.201201 0.487040  
 O 0.224882 0.866254 -0.907378  
 C 0.544562 1.922729 -0.001810  
 C 1.836687 2.517628 -0.531693  
 O 2.821754 1.498865 -0.675658  
 C -0.586030 2.936619 0.105537  
 O -1.641109 2.506189 0.953362  
 N 0.279352 -2.426598 -0.850523  
 C 1.080430 -1.913884 0.089520  
 N 0.538586 -1.476587 1.234907  
 N 2.406937 -1.920794 -0.082326  
 C 3.350651 -1.444896 0.922708  
 H -4.457854 -0.393282 1.020056  
 H 4.351537 -1.548918 0.507854  
 H -4.159332 0.625752 -0.385628  
 H -4.814991 -1.025298 -0.611012  
 H 3.176352 -0.387167 1.126825  
 H 3.287016 -2.030168 1.844323  
 H 2.766023 -2.481050 -0.841152  
 H 1.147401 -1.032065 1.904730  
 H -0.408867 -1.080352 1.143361  
 H 0.654717 -2.509677 -1.783525  
 H -0.744569 -2.286940 -0.766168  
 H 0.733954 1.512178 1.001410  
 H 1.639173 3.008572 -1.495307  
 H 2.230673 3.258425 0.167734  
 H -0.199950 3.867777 0.534645  
 H -0.945684 3.146282 -0.912172  
 H -1.823640 1.571830 0.746633  
 H -0.520370 0.379223 -0.505783  
 H 2.330220 0.760834 -1.057904

## Glycerol\_Orientation6

C -3.989539 -0.463696 -0.576816  
 C -2.845987 0.459245 -0.173546  
 O -1.953400 -0.053653 0.585639  
 O -2.836525 1.636146 -0.597381  
 O -1.133536 -2.529669 1.035282  
 C -0.302078 -2.862640 -0.066399  
 C 0.824472 -1.840603 -0.205684  
 C 1.974489 -2.325228 -1.065736  
 O 3.057938 -1.398580 -1.044957  
 O 1.366784 -1.556931 1.089342

N -0.476952 3.070697 -0.242570  
 C 0.591435 2.359247 0.156842  
 N 1.828456 2.810384 -0.074862  
 C 3.024276 2.068904 0.301017  
 N 0.397394 1.260748 0.889488  
 H -4.433752 -0.908346 0.317435  
 H 3.890086 2.663308 0.015797  
 H -4.750000 0.075139 -1.142664  
 H -3.591595 -1.281084 -1.185885  
 H 3.050967 1.909025 1.381838  
 H 3.067493 1.106402 -0.215770  
 H 1.930148 3.633455 -0.648929  
 H 1.162339 0.610616 1.025491  
 H -0.545909 0.819236 0.835098  
 H -0.310292 3.787423 -0.932983  
 H -1.377314 2.561361 -0.323219  
 H 0.415853 -0.914361 -0.628984  
 H 2.303357 -3.308270 -0.703040  
 H 1.655878 -2.420163 -2.106571  
 H -0.864485 -2.919536 -1.007108  
 H 0.123443 -3.847926 0.149252  
 H -1.547050 -1.659248 0.828443  
 H 0.627471 -1.743419 1.687845  
 H 3.278584 -1.306289 -0.111905

## Glycerol\_Orientation18

C 3.423129 -1.969742 -0.419312  
 C 1.950723 -1.609922 -0.300394  
 O 1.548775 -1.241210 0.860519  
 O 1.236355 -1.664807 -1.328323  
 O 0.168472 1.037599 1.088159  
 C 0.615248 1.720236 -0.084574  
 C 1.982067 2.335818 0.156847  
 H 2.276212 2.951570 -0.698618  
 C -0.457275 2.749248 -0.407069  
 O -1.737764 2.121325 -0.427235  
 N -1.189788 -1.990835 1.079254  
 C -1.888970 -1.222467 0.224830  
 N -1.388312 -0.978399 -0.990039  
 N -3.115300 -0.796838 0.538799  
 C -4.054053 -0.264390 -0.444956  
 O 2.990385 1.340805 0.310186  
 H -3.450422 -0.979142 1.472845  
 H 3.754031 -2.514913 0.466494  
 H 3.612531 -2.552516 -1.321181  
 H 3.988556 -1.034488 -0.472948  
 H -1.588908 -2.146725 1.993357  
 H -0.168600 -1.874215 1.046780  
 H -1.710174 -0.128759 -1.435196  
 H -0.389707 -1.235088 -1.143594

H 0.692962 1.007225 -0.915703  
 H -0.435371 3.550607 0.344376  
 H -0.288218 3.185314 -1.393675  
 H 1.921496 2.974510 1.048741  
 H 0.582589 0.149488 1.049351  
 H -1.726218 1.593417 0.382628  
 H -5.042637 -0.254082 0.010501  
 H -3.786072 0.752860 -0.738174  
 H -4.072513 -0.906954 -1.328474  
 H 2.609279 0.642023 0.857709

## Glycerol molecule

C 1.230301 -0.100657 0.685218  
 C 0.022259 0.802335 0.446717  
 O 0.107324 1.369851 -0.860234  
 O 1.405206 -1.002204 -0.408247  
 C -1.301211 0.061658 0.597989  
 O -1.412337 -1.007724 -0.348916  
 H 2.138326 0.505071 0.727798  
 H 1.117588 -0.634765 1.636639  
 H 0.042808 1.621077 1.175305  
 H -2.130319 0.767950 0.476565  
 H -1.367733 -0.392557 1.589706  
 H -1.489459 -0.578573 -1.207617  
 H 0.616751 0.723626 -1.365301  
 H 0.562402 -1.471224 -0.473454

## Salt-bridge

C 3.921394 -0.239929 0.009408  
 C 2.399787 -0.096208 0.031723  
 O 1.722775 -1.134909 -0.214770  
 O 1.938809 1.056998 0.260664  
 N -0.932455 -0.898168 0.116087  
 C -1.491758 0.299662 -0.045011  
 N -0.709912 1.371908 -0.229063  
 N -2.826566 0.444539 -0.001528  
 C -3.746990 -0.678781 0.091485  
 H 4.219372 -1.262459 0.246865  
 H -4.747172 -0.279698 0.250740  
 H 4.278700 -0.002625 -0.998075  
 H 4.383731 0.462190 0.705543  
 H -3.748092 -1.287737 -0.818099  
 H -3.486221 -1.303019 0.948755  
 H -3.196830 1.330877 -0.308749  
 H -1.506019 -1.715310 -0.020750  
 H 0.107366 -0.990393 -0.018032  
 H -1.123985 2.272654 -0.040368  
 H 0.314413 1.262389 -0.039085
